# Supplementary material for: Network Pharmacology-Based Approach to Investigate the Mechanisms of Mahai Capsules in the Treatment of Cardiovascular Diseases
Source: Evid Based Complement Alternat Med. 2020 May 12;2020:9180982. doi: 10.1155/2020/9180982 (PMC7243029; doi:10.1155/2020/9180982)
Supplement: Supplementary Materials — Table S1: targets of the 75 candidate compounds of Haima. Table S2: targets-diseases. [file 9180982.f1.zip]

Archive with 2 entries (2 files):
- 9180982.f1/Table S1-Targets of the 75 candidate compounds of Haima.xlsx
- 9180982.f1/Table S2-Targets-Diseases.xlsx
