# Supplementary material for: Network Pharmacology-Based Approach to Investigate the Mechanisms of Mahai Capsules in the Treatment of Cardiovascular Diseases
Source: Evid Based Complement Alternat Med. 2020 May 12;2020:9180982. doi: 10.1155/2020/9180982 (PMC7243029; doi:10.1155/2020/9180982)
Supplement: Supplementary Materials — Table S1: targets of the 75 candidate compounds of Haima. Table S2: targets-diseases. [file 9180982.f1.zip › 9180982.f1/Table S1-Targets of the 75 candidate compounds of Haima.xlsx]

## Sheet: Table S1
Table S1. Targets of the 75 candidate compounds of Haima.
Code	Molecule	Target	TTD Target ID	Target Type	Uniprot ID
M01	Mairin	Progesterone receptor	TTDS00245	Successful target	P06401
M02	Jaranol	Androgen receptor	TTDS00367	Successful target	P10275
M02	Jaranol	Calmodulin	TTDS00432	Successful target	P62158
M02	Jaranol	Cell division protein kinase 2	TTDC00088	Successful target	P24941
M02	Jaranol	Dipeptidyl peptidase IV	TTDS00093	Successful target	P27487
M02	Jaranol	Estrogen receptor beta	TTDS00250	Successful target	Q92731
M02	Jaranol	Heat shock protein HSP 90	TTDC00018	Clinical trial target	P07900
M02	Jaranol	Nitric oxide synthase, inducible	TTDS00337	Successful target	P35228
M02	Jaranol	Nuclear receptor coactivator 2	#N/A	#N/A	Q15596
M02	Jaranol	Prostaglandin G/H synthase 1	TTDS00040	Successful target	P23219
M02	Jaranol	Prostaglandin G/H synthase 2	TTDS00041	Successful target	P35354
M02	Jaranol	Serine/threonine-protein kinase Chk1	TTDC00005	Clinical trial target	O14757
M02	Jaranol	Sodium channel protein type 5 subunit alpha	TTDS00402	Successful target	Q14524
M02	Jaranol	Trypsin-1	TTDS00282	Clinical trial target	P07477
M03	hederagenin	Alcohol dehydrogenase 1B	#N/A	#N/A	P00325
M03	hederagenin	Alcohol dehydrogenase 1C	#N/A	#N/A	P00326
M03	hederagenin	Alpha-1B adrenergic receptor	TTDS00029	Successful target	P35368
M03	hederagenin	CGMP-inhibited 3',5'-cyclic phosphodiesterase A	TTDS00390	Successful target	Q14432
M03	hederagenin	Cytochrome P450-cam	#N/A	#N/A	P00183
M03	hederagenin	Gamma-aminobutyric acid receptor subunit alpha-1	TTDS00403	Successful target	P14867
M03	hederagenin	Gamma-aminobutyric-acid receptor alpha-2 subunit	TTDR01177	Clinical trial target	P47869
M03	hederagenin	Gamma-aminobutyric-acid receptor alpha-3 subunit	TTDR01178	Clinical trial target	P34903
M03	hederagenin	Gamma-aminobutyric-acid receptor alpha-5 subunit	TTDR01042	Clinical trial target	P31644
M03	hederagenin	Gamma-aminobutyric-acid receptor subunit alpha-6	#N/A	#N/A	Q16445
M03	hederagenin	Glutamate receptor 2	TTDI01970	Research target	P42262
M03	hederagenin	Ig gamma-1 chain C region	#N/A	#N/A	P01857
M03	hederagenin	Lysozyme	TTDI02118	Research target	P61626
M03	hederagenin	Muscarinic acetylcholine receptor M1	TTDS00002	Successful target	P11229
M03	hederagenin	Muscarinic acetylcholine receptor M2	TTDS00003	Successful target	P08172
M03	hederagenin	Muscarinic acetylcholine receptor M3	TTDS00004	Successful target	P20309
M03	hederagenin	Nicotinate-nucleotide--dimethylbenzimidazole phosphoribosyltransferase	#N/A	#N/A	Q5PDU9
M03	hederagenin	Nuclear receptor coactivator 2	#N/A	#N/A	Q15596
M03	hederagenin	Progesterone receptor	TTDS00245	Successful target	P06401
M03	hederagenin	Prostaglandin G/H synthase 1	TTDS00040	Successful target	P23219
M03	hederagenin	Prostaglandin G/H synthase 2	TTDS00041	Successful target	P35354
M03	hederagenin	Retinoic acid receptor RXR-alpha	TTDR01073	Research target	P19793
M03	hederagenin	Sodium channel protein type 5 subunit alpha	TTDS00402	Successful target	Q14524
M03	hederagenin	Sodium-dependent noradrenaline transporter	TTDC00304	Successful target	P23975
M04	(3S,8S,9S,10R,13R,14S,17R)-10,13-dimethyl-17-[(2R,5S)-5-propan-2-yloctan-2-yl]-2,3,4,7,8,9,11,12,14,15,16,17-dodecahydro-1H-cyclopenta[a]phenanthren-3-ol	Progesterone receptor	TTDS00245	Successful target	P06401
M05	isorhamnetin	Acetylcholinesterase	TTDS00140	Successful target	P22303
M05	isorhamnetin	Aldose reductase	TTDS00115	Successful target	P15121
M05	isorhamnetin	Amine oxidase [flavin-containing] B	TTDS00341	Successful target	P27338
M05	isorhamnetin	Androgen receptor	TTDS00367	Successful target	P10275
M05	isorhamnetin	Calmodulin	TTDS00432	Successful target	P62158
M05	isorhamnetin	Cell division protein kinase 2	TTDC00088	Successful target	P24941
M05	isorhamnetin	Coagulation factor VII	TTDR00947	Successful target	P08709
M05	isorhamnetin	Cyclin-A2	#N/A	#N/A	P20248
M05	isorhamnetin	Cytochrome P450-cam	#N/A	#N/A	P00183
M05	isorhamnetin	Dipeptidyl peptidase IV	TTDS00093	Successful target	P27487
M05	isorhamnetin	Estrogen receptor	TTDS00242	Imprecisely defined successful target type 1 (ambiguous subtype/subunit)	P03372
M05	isorhamnetin	Estrogen receptor beta	TTDS00250	Successful target	Q92731
M05	isorhamnetin	Gamma-aminobutyric acid receptor subunit alpha-1	TTDS00403	Successful target	P14867
M05	isorhamnetin	Glutamate receptor 2	TTDI01970	Research target	P42262
M05	isorhamnetin	Glycogen phosphorylase, muscle form	TTDC00099	Clinical trial target	P11217
M05	isorhamnetin	Glycogen synthase kinase-3 beta	TTDC00162	Clinical trial target	P49841
M05	isorhamnetin	Heat shock protein HSP 90	TTDC00018	Clinical trial target	P07900
M05	isorhamnetin	Mitogen-activated protein kinase 14	TTDC00201	Clinical trial target	Q16539
M05	isorhamnetin	mRNA of PKA Catalytic Subunit C-alpha	TTDR01375	Research target	P17612
M05	isorhamnetin	mRNA of Protein-tyrosine phosphatase, non-receptor type 1	TTDC00191	Research target	P18031
M05	isorhamnetin	Neutrophil cytosol factor 1	TTDR00938	Research target	P14598
M05	isorhamnetin	Nitric oxide synthase, inducible	TTDS00337	Successful target	P35228
M05	isorhamnetin	Nitric-oxide synthase, endothelial	TTDC00097	Clinical trial target	P29474
M05	isorhamnetin	Nuclear receptor coactivator 1	#N/A	#N/A	Q15788
M05	isorhamnetin	Nuclear receptor coactivator 2	#N/A	#N/A	Q15596
M05	isorhamnetin	Oxidized low-density lipoprotein receptor 1	#N/A	#N/A	P78380
M05	isorhamnetin	Peroxisome proliferator activated receptor delta	TTDC00069	Clinical trial target	Q03181
M05	isorhamnetin	Peroxisome proliferator activated receptor gamma	TTDS00338	Successful target	P37231
M05	isorhamnetin	Phosphatidylinositol-4,5-bisphosphate 3-kinase catalytic subunit, gamma isoform	#N/A	#N/A	P48736
M05	isorhamnetin	Prostaglandin G/H synthase 1	TTDS00040	Successful target	P23219
M05	isorhamnetin	Prostaglandin G/H synthase 2	TTDS00041	Successful target	P35354
M05	isorhamnetin	Proto-oncogene serine/threonine-protein kinase Pim-1	#N/A	#N/A	P11309
M05	isorhamnetin	Serine/threonine-protein kinase Chk1	TTDC00005	Clinical trial target	O14757
M05	isorhamnetin	Thrombin	TTDS00202	Successful target	P00734
M05	isorhamnetin	Transcription factor p65	#N/A	#N/A	Q04206
M05	isorhamnetin	Trypsin-1	#N/A	#N/A	P07477
M05	isorhamnetin	Xanthine dehydrogenase/oxidase	TTDS00056	Successful target	P47989
M06	3,9-di-O-methylnissolin	5-hydroxytryptamine receptor 3A	TTDS00399	Successful target	P46098
M06	3,9-di-O-methylnissolin	Acetylcholinesterase	TTDS00140	Successful target	P22303
M06	3,9-di-O-methylnissolin	Alpha-1B adrenergic receptor	TTDS00029	Successful target	P35368
M06	3,9-di-O-methylnissolin	Alpha-1D adrenergic receptor	TTDS00030	Successful target	P25100
M06	3,9-di-O-methylnissolin	Alpha-2C adrenergic receptor	TTDR01180	Successful target	P18825
M06	3,9-di-O-methylnissolin	Beta-1 adrenergic receptor	TTDS00036	Successful target	P08588
M06	3,9-di-O-methylnissolin	Beta-2 adrenergic receptor	TTDS00037	Successful target	P07550
M06	3,9-di-O-methylnissolin	Calmodulin	TTDS00432	Successful target	P62158
M06	3,9-di-O-methylnissolin	CGMP-inhibited 3',5'-cyclic phosphodiesterase A	TTDS00390	Successful target	Q14432
M06	3,9-di-O-methylnissolin	Estrogen receptor	TTDS00242	Imprecisely defined successful target type 1 (ambiguous subtype/subunit)	P03372
M06	3,9-di-O-methylnissolin	Gamma-aminobutyric acid receptor subunit alpha-1	TTDS00403	Successful target	P14867
M06	3,9-di-O-methylnissolin	Muscarinic acetylcholine receptor M1	TTDS00002	Successful target	P11229
M06	3,9-di-O-methylnissolin	Muscarinic acetylcholine receptor M3	TTDS00004	Successful target	P20309
M06	3,9-di-O-methylnissolin	Mu-type opioid receptor	TTDS00126	Successful target	P35372
M06	3,9-di-O-methylnissolin	Nitric oxide synthase, inducible	TTDS00337	Successful target	P35228
M06	3,9-di-O-methylnissolin	Nitric-oxide synthase, endothelial	TTDC00097	Clinical trial target	P29474
M06	3,9-di-O-methylnissolin	Nuclear receptor coactivator 2	#N/A	#N/A	Q15596
M06	3,9-di-O-methylnissolin	Prostaglandin G/H synthase 1	TTDS00040	Successful target	P23219
M06	3,9-di-O-methylnissolin	Prostaglandin G/H synthase 2	TTDS00041	Successful target	P35354
M06	3,9-di-O-methylnissolin	Retinoic acid receptor RXR-alpha	TTDR01073	Research target	P19793
M06	3,9-di-O-methylnissolin	Sodium channel protein type 5 subunit alpha	TTDS00402	Successful target	Q14524
M06	3,9-di-O-methylnissolin	Thrombin	TTDS00202	Successful target	P00734
M06	3,9-di-O-methylnissolin	Trypsin-1	#N/A	#N/A	P07477
M07	5'-hydroxyiso-muronulatol-2',5'-di-O-glucoside	DNA topoisomerase II	#N/A	#N/A	Q02880
M07	5'-hydroxyiso-muronulatol-2',5'-di-O-glucoside	Nuclear receptor coactivator 2	#N/A	#N/A	Q15596
M07	5'-hydroxyiso-muronulatol-2',5'-di-O-glucoside	Prostaglandin G/H synthase 2	TTDS00041	Successful target	P35354
M08	7-O-methylisomucronulatol	5-hydroxytryptamine 2A receptor	TTDS00103	Successful target	P28223
M08	7-O-methylisomucronulatol	Alpha-1A adrenergic receptor	TTDC00292	Successful target	P35348
M08	7-O-methylisomucronulatol	Alpha-1B adrenergic receptor	TTDS00029	Successful target	P35368
M08	7-O-methylisomucronulatol	Alpha-1D adrenergic receptor	TTDS00030	Successful target	P25100
M08	7-O-methylisomucronulatol	Alpha-2C adrenergic receptor	TTDR01180	Successful target	P18825
M08	7-O-methylisomucronulatol	Androgen receptor	TTDS00367	Successful target	P10275
M08	7-O-methylisomucronulatol	Beta-1 adrenergic receptor	TTDS00036	Successful target	P08588
M08	7-O-methylisomucronulatol	Beta-2 adrenergic receptor	TTDS00037	Successful target	P07550
M08	7-O-methylisomucronulatol	Calcium-activated potassium channel subunit alpha 1	#N/A	#N/A	Q12791
M08	7-O-methylisomucronulatol	Calmodulin	TTDS00432	Successful target	P62158
M08	7-O-methylisomucronulatol	Cell division protein kinase 2	TTDC00088	Successful target	P24941
M08	7-O-methylisomucronulatol	CGMP-inhibited 3',5'-cyclic phosphodiesterase A	TTDS00390	Successful target	Q14432
M08	7-O-methylisomucronulatol	Coagulation factor Xa	TTDS00203	Successful target	P00742
M08	7-O-methylisomucronulatol	Cyclin-A2	#N/A	#N/A	P20248
M08	7-O-methylisomucronulatol	Delta-type opioid receptor	TTDS00128	Successful target	P41143
M08	7-O-methylisomucronulatol	Dipeptidyl peptidase IV	TTDS00093	Successful target	P27487
M08	7-O-methylisomucronulatol	Dopamine D1 receptor	TTDS00011	Successful target	P21728
M08	7-O-methylisomucronulatol	Estrogen receptor	TTDS00242	Imprecisely defined successful target type 1 (ambiguous subtype/subunit)	P03372
M08	7-O-methylisomucronulatol	Estrogen receptor beta	TTDS00250	Successful target	Q92731
M08	7-O-methylisomucronulatol	Gamma-aminobutyric acid receptor subunit alpha-1	TTDS00403	Successful target	P14867
M08	7-O-methylisomucronulatol	Glycogen synthase kinase-3 beta	TTDC00162	Clinical trial target	P49841
M08	7-O-methylisomucronulatol	Heat shock protein HSP 90	TTDC00018	Clinical trial target	P07900
M08	7-O-methylisomucronulatol	Mitogen-activated protein kinase 14	TTDC00201	Clinical trial target	Q16539
M08	7-O-methylisomucronulatol	mRNA of PKA Catalytic Subunit C-alpha	TTDR01375	Research target	P17612
M08	7-O-methylisomucronulatol	Muscarinic acetylcholine receptor M1	TTDS00002	Successful target	P11229
M08	7-O-methylisomucronulatol	Muscarinic acetylcholine receptor M2	TTDS00003	Successful target	P08172
M08	7-O-methylisomucronulatol	Muscarinic acetylcholine receptor M3	TTDS00004	Successful target	P20309
M08	7-O-methylisomucronulatol	Muscarinic acetylcholine receptor M4	TTDS00005	Successful target	P08173
M08	7-O-methylisomucronulatol	Muscarinic acetylcholine receptor M5	TTDS00006	Successful target	P08912
M08	7-O-methylisomucronulatol	Nitric oxide synthase, inducible	TTDS00337	Successful target	P35228
M08	7-O-methylisomucronulatol	Nitric-oxide synthase, endothelial	TTDC00097	Clinical trial target	P29474
M08	7-O-methylisomucronulatol	Nuclear receptor coactivator 2	#N/A	#N/A	Q15596
M08	7-O-methylisomucronulatol	Peroxisome proliferator activated receptor gamma	TTDS00338	Successful target	P37231
M08	7-O-methylisomucronulatol	Potassium voltage-gated channel subfamily H member 2	TTDS00147	Successful target	Q12809
M08	7-O-methylisomucronulatol	Prostaglandin G/H synthase 1	TTDS00040	Successful target	P23219
M08	7-O-methylisomucronulatol	Prostaglandin G/H synthase 2	TTDS00041	Successful target	P35354
M08	7-O-methylisomucronulatol	Proto-oncogene serine/threonine-protein kinase Pim-1	#N/A	#N/A	P11309
M08	7-O-methylisomucronulatol	Retinoic acid receptor RXR-alpha	TTDR01073	Research target	P19793
M08	7-O-methylisomucronulatol	Retinoic acid receptor RXR-beta	#N/A	#N/A	P19793
M08	7-O-methylisomucronulatol	Serine/threonine-protein kinase Chk1	TTDC00005	Clinical trial target	O14757
M08	7-O-methylisomucronulatol	Sodium channel protein type 5 subunit alpha	TTDS00402	Successful target	Q14524
M08	7-O-methylisomucronulatol	Sodium-dependent dopamine transporter	TTDS00017	Successful target	Q01959
M08	7-O-methylisomucronulatol	Sodium-dependent serotonin transporter	TTDC00255	Successful target	P31645
M08	7-O-methylisomucronulatol	Thrombin	TTDS00202	Successful target	P00734
M08	7-O-methylisomucronulatol	Trypsin-1	#N/A	#N/A	P07477
M10	(6aR,11aR)-9,10-dimethoxy-6a,11a-dihydro-6H-benzofurano[3,2-c]chromen-3-ol	5-hydroxytryptamine receptor 3A	TTDS00399	Successful target	P46098
M10	(6aR,11aR)-9,10-dimethoxy-6a,11a-dihydro-6H-benzofurano[3,2-c]chromen-3-ol	Acetylcholinesterase	TTDS00140	Successful target	P22303
M10	(6aR,11aR)-9,10-dimethoxy-6a,11a-dihydro-6H-benzofurano[3,2-c]chromen-3-ol	Alpha-1B adrenergic receptor	TTDS00029	Successful target	P35368
M10	(6aR,11aR)-9,10-dimethoxy-6a,11a-dihydro-6H-benzofurano[3,2-c]chromen-3-ol	Alpha-1D adrenergic receptor	TTDS00030	Successful target	P25100
M10	(6aR,11aR)-9,10-dimethoxy-6a,11a-dihydro-6H-benzofurano[3,2-c]chromen-3-ol	Beta-2 adrenergic receptor	TTDS00037	Successful target	P07550
M10	(6aR,11aR)-9,10-dimethoxy-6a,11a-dihydro-6H-benzofurano[3,2-c]chromen-3-ol	Calmodulin	TTDS00432	Successful target	P62158
M10	(6aR,11aR)-9,10-dimethoxy-6a,11a-dihydro-6H-benzofurano[3,2-c]chromen-3-ol	Estrogen receptor	TTDS00242	Imprecisely defined successful target type 1 (ambiguous subtype/subunit)	P03372
M10	(6aR,11aR)-9,10-dimethoxy-6a,11a-dihydro-6H-benzofurano[3,2-c]chromen-3-ol	Gamma-aminobutyric acid receptor subunit alpha-1	TTDS00403	Successful target	P14867
M10	(6aR,11aR)-9,10-dimethoxy-6a,11a-dihydro-6H-benzofurano[3,2-c]chromen-3-ol	Heat shock protein HSP 90	TTDC00018	Clinical trial target	P07900
M10	(6aR,11aR)-9,10-dimethoxy-6a,11a-dihydro-6H-benzofurano[3,2-c]chromen-3-ol	Muscarinic acetylcholine receptor M1	TTDS00002	Successful target	P11229
M10	(6aR,11aR)-9,10-dimethoxy-6a,11a-dihydro-6H-benzofurano[3,2-c]chromen-3-ol	Muscarinic acetylcholine receptor M3	TTDS00004	Successful target	P20309
M10	(6aR,11aR)-9,10-dimethoxy-6a,11a-dihydro-6H-benzofurano[3,2-c]chromen-3-ol	Muscarinic acetylcholine receptor M4	TTDS00005	Successful target	P08173
M10	(6aR,11aR)-9,10-dimethoxy-6a,11a-dihydro-6H-benzofurano[3,2-c]chromen-3-ol	Neuronal acetylcholine receptor protein, alpha-7 chain	TTDS00520	Successful target	P36544
M10	(6aR,11aR)-9,10-dimethoxy-6a,11a-dihydro-6H-benzofurano[3,2-c]chromen-3-ol	Nitric oxide synthase, inducible	TTDS00337	Successful target	P35228
M10	(6aR,11aR)-9,10-dimethoxy-6a,11a-dihydro-6H-benzofurano[3,2-c]chromen-3-ol	Nuclear receptor coactivator 1	#N/A	#N/A	Q15788
M10	(6aR,11aR)-9,10-dimethoxy-6a,11a-dihydro-6H-benzofurano[3,2-c]chromen-3-ol	Nuclear receptor coactivator 2	#N/A	#N/A	Q15596
M10	(6aR,11aR)-9,10-dimethoxy-6a,11a-dihydro-6H-benzofurano[3,2-c]chromen-3-ol	Prostaglandin G/H synthase 1	TTDS00040	Successful target	P23219
M10	(6aR,11aR)-9,10-dimethoxy-6a,11a-dihydro-6H-benzofurano[3,2-c]chromen-3-ol	Prostaglandin G/H synthase 2	TTDS00041	Successful target	P35354
M10	(6aR,11aR)-9,10-dimethoxy-6a,11a-dihydro-6H-benzofurano[3,2-c]chromen-3-ol	Retinoic acid receptor RXR-alpha	TTDR01073	Research target	P19793
M10	(6aR,11aR)-9,10-dimethoxy-6a,11a-dihydro-6H-benzofurano[3,2-c]chromen-3-ol	Sodium channel protein type 5 subunit alpha	TTDS00402	Successful target	Q14524
M10	(6aR,11aR)-9,10-dimethoxy-6a,11a-dihydro-6H-benzofurano[3,2-c]chromen-3-ol	Thrombin	TTDS00202	Successful target	P00734
M10	(6aR,11aR)-9,10-dimethoxy-6a,11a-dihydro-6H-benzofurano[3,2-c]chromen-3-ol	Trypsin-1	#N/A	#N/A	P07477
M11	Bifendate	Calcium-activated potassium channel subunit alpha 1	#N/A	#N/A	Q12791
M11	Bifendate	DNA topoisomerase II	#N/A	#N/A	Q02880
M11	Bifendate	Heat shock protein HSP 90	TTDC00018	Clinical trial target	P07900
M11	Bifendate	Hepatocyte growth factor receptor	TTDC00110	Successful target	P08581
M11	Bifendate	Prostaglandin G/H synthase 1	TTDS00040	Successful target	P23219
M11	Bifendate	Prostaglandin G/H synthase 2	TTDS00041	Successful target	P35354
M11	Bifendate	Vascular endothelial growth factor receptor 2	TTDS00008	Successful target	P35968
M12	formononetin	3 beta-hydroxysteroid dehydrogenase/Delta 5-->4-isomerase type 1	#N/A	#N/A	P14060
M12	formononetin	3 beta-hydroxysteroid dehydrogenase/Delta 5-->4-isomerase type 2	#N/A	#N/A	P26439
M12	formononetin	Acetylcholinesterase	TTDS00140	Successful target	P22303
M12	formononetin	Alpha-1A adrenergic receptor	TTDC00292	Successful target	P35348
M12	formononetin	Amine oxidase [flavin-containing] B	TTDS00341	Successful target	P27338
M12	formononetin	Androgen receptor	TTDS00367	Successful target	P10275
M12	formononetin	ATP synthase subunit beta, mitochondrial	#N/A	#N/A	P06576
M12	formononetin	Beta-2 adrenergic receptor	TTDS00037	Successful target	P07550
M12	formononetin	Beta-lactamase	TTDS00228	Imprecisely defined successful target type 2 (ambiguous target species)	P00807
M12	formononetin	Calmodulin	TTDS00432	Successful target	P62158
M12	formononetin	cAMP-dependent protein kinase inhibitor alpha	#N/A	#N/A	P61925
M12	formononetin	Cell division protein kinase 2	TTDC00088	Successful target	P24941
M12	formononetin	CGMP-inhibited 3',5'-cyclic phosphodiesterase A	TTDS00390	Successful target	Q14432
M12	formononetin	Cyclin-A2	#N/A	#N/A	P20248
M12	formononetin	Dipeptidyl peptidase IV	TTDS00093	Successful target	P27487
M12	formononetin	Estrogen receptor	TTDS00242	Imprecisely defined successful target type 1 (ambiguous subtype/subunit)	P03372
M12	formononetin	Estrogen receptor beta	TTDS00250	Successful target	Q92731
M12	formononetin	Glycogen synthase kinase-3 beta	TTDC00162	Clinical trial target	P49841
M12	formononetin	Heat shock protein HSP 90	TTDC00018	Clinical trial target	P07900
M12	formononetin	Interleukin-4	TTDR00086	Clinical trial target	P05112
M12	formononetin	Mitogen-activated protein kinase 14	TTDC00201	Clinical trial target	Q16539
M12	formononetin	mRNA of PKA Catalytic Subunit C-alpha	TTDR01375	Research target	P17612
M12	formononetin	Muscarinic acetylcholine receptor M1	TTDS00002	Successful target	P11229
M12	formononetin	NAD-dependent deacetylase sirtuin-1	TTDC00052	Clinical trial target	Q96EB6
M12	formononetin	NADH-ubiquinone oxidoreductase chain 6	#N/A	#N/A	P03923
M12	formononetin	Nitric oxide synthase, inducible	TTDS00337	Successful target	P35228
M12	formononetin	Nitric-oxide synthase, endothelial	TTDC00097	Clinical trial target	P29474
M12	formononetin	Peroxisome proliferator activated receptor gamma	TTDS00338	Successful target	P37231
M12	formononetin	Peroxisome proliferator-activated receptor gamma	#N/A	#N/A	P37231
M12	formononetin	Prostaglandin G/H synthase 1	TTDS00040	Successful target	P23219
M12	formononetin	Prostaglandin G/H synthase 2	TTDS00041	Successful target	P35354
M12	formononetin	Proto-oncogene serine/threonine-protein kinase Pim-1	#N/A	#N/A	P11309
M12	formononetin	Retinoic acid receptor RXR-alpha	TTDR01073	Research target	P19793
M12	formononetin	Serine/threonine-protein kinase Chk1	TTDC00005	Clinical trial target	O14757
M12	formononetin	Sodium-dependent dopamine transporter	TTDS00017	Successful target	Q01959
M12	formononetin	Sodium-dependent serotonin transporter	TTDC00255	Successful target	P31645
M12	formononetin	Thrombin	TTDS00202	Successful target	P00734
M12	formononetin	Transcription factor AP-1	TTDC00119	Clinical trial target	P05412
M12	formononetin	Trypsin-1	#N/A	#N/A	P07477
M14	Calycosin	Androgen receptor	TTDS00367	Successful target	P10275
M14	Calycosin	Beta-2 adrenergic receptor	TTDS00037	Successful target	P07550
M14	Calycosin	Calmodulin	TTDS00432	Successful target	P62158
M14	Calycosin	Cell division protein kinase 2	TTDC00088	Successful target	P24941
M14	Calycosin	CGMP-inhibited 3',5'-cyclic phosphodiesterase A	TTDS00390	Successful target	Q14432
M14	Calycosin	Cyclin-A2	#N/A	#N/A	P20248
M14	Calycosin	Dipeptidyl peptidase IV	TTDS00093	Successful target	P27487
M14	Calycosin	Estrogen receptor	TTDS00242	Imprecisely defined successful target type 1 (ambiguous subtype/subunit)	P03372
M14	Calycosin	Estrogen receptor beta	TTDS00250	Successful target	Q92731
M14	Calycosin	Glycogen synthase kinase-3 beta	TTDC00162	Clinical trial target	P49841
M14	Calycosin	Heat shock protein HSP 90	TTDC00018	Clinical trial target	P07900
M14	Calycosin	Mitogen-activated protein kinase 14	TTDC00201	Clinical trial target	Q16539
M14	Calycosin	mRNA of PKA Catalytic Subunit C-alpha	TTDR01375	Research target	P17612
M14	Calycosin	Nitric oxide synthase, inducible	TTDS00337	Successful target	P35228
M14	Calycosin	Nuclear receptor coactivator 2	#N/A	#N/A	Q15596
M14	Calycosin	Peroxisome proliferator activated receptor gamma	TTDS00338	Successful target	P37231
M14	Calycosin	Prostaglandin G/H synthase 1	TTDS00040	Successful target	P23219
M14	Calycosin	Prostaglandin G/H synthase 2	TTDS00041	Successful target	P35354
M14	Calycosin	Proto-oncogene serine/threonine-protein kinase Pim-1	#N/A	#N/A	P11309
M14	Calycosin	Retinoic acid receptor RXR-alpha	TTDR01073	Research target	P19793
M14	Calycosin	Serine/threonine-protein kinase Chk1	TTDC00005	Clinical trial target	O14757
M14	Calycosin	Trypsin-1	#N/A	#N/A	P07477
M15	kaempferol	26S proteasome non-ATPase regulatory subunit 3	#N/A	#N/A	O43242
M15	kaempferol	Acetylcholinesterase	TTDS00140	Successful target	P22303
M15	kaempferol	Activator of 90 kDa heat shock protein ATPase homolog 1	#N/A	#N/A	O95433
M15	kaempferol	Aldo-keto reductase family 1 member C3	TTDR00033	Successful target	P42330
M15	kaempferol	Alpha-1B adrenergic receptor	TTDS00029	Successful target	P35368
M15	kaempferol	Androgen receptor	TTDS00367	Successful target	P10275
M15	kaempferol	Antileukoproteinase	#N/A	#N/A	P03973
M15	kaempferol	Apoptosis regulator BAX	#N/A	#N/A	Q07812
M15	kaempferol	Apoptosis regulator Bcl-2	TTDC00319	Successful target	P10415
M15	kaempferol	Arachidonate 5-lipoxygenase	TTDS00112	Successful target	P09917
M15	kaempferol	Aryl hydrocarbon receptor	TTDI02013	Research target	P35869
M15	kaempferol	Calmodulin	TTDS00432	Successful target	P62158
M15	kaempferol	Caspase-3	#N/A	#N/A	P42574
M15	kaempferol	Cell division control protein 2 homolog	TTDC00166	Clinical trial target	P06493
M15	kaempferol	Coagulation factor VII	TTDR00947	Successful target	P08709
M15	kaempferol	Cytochrome P450 1A1	#N/A	#N/A	P04798
M15	kaempferol	Cytochrome P450 1A2	#N/A	#N/A	P05177
M15	kaempferol	Cytochrome P450 1B1	TTDR00242	Clinical trial target	Q16678
M15	kaempferol	Cytochrome P450 3A4	TTDS00418	Successful target	P08684
M15	kaempferol	Dipeptidyl peptidase IV	TTDS00093	Successful target	P27487
M15	kaempferol	DNA topoisomerase II	#N/A	#N/A	Q02880
M15	kaempferol	E-selectin	TTDC00098	Clinical trial target	P16581
M15	kaempferol	Gamma-aminobutyric acid receptor subunit alpha-1	TTDS00403	Successful target	P14867
M15	kaempferol	Gamma-aminobutyric-acid receptor alpha-2 subunit	TTDR01177	Clinical trial target	P47869
M15	kaempferol	Glutathione S-transferase Mu 1	#N/A	#N/A	P09488
M15	kaempferol	Glutathione S-transferase Mu 2	#N/A	#N/A	P28161
M15	kaempferol	Glutathione S-transferase P	TTDI02088	Clinical trial target	P09211
M15	kaempferol	Heat shock protein HSP 90	TTDC00018	Clinical trial target	P07900
M15	kaempferol	Heme oxygenase 1	TTDC00134	Clinical trial target	P09601
M15	kaempferol	Hyaluronan synthase 2	#N/A	#N/A	Q92819
M15	kaempferol	Inhibitor of nuclear factor kappa-B kinase subunit beta	#N/A	#N/A	O14920
M15	kaempferol	Insulin receptor	TTDS00292	Successful target	P06213
M15	kaempferol	Intercellular adhesion molecule 1	#N/A	#N/A	P01583
M15	kaempferol	Interstitial collagenase	TTDC00147	Clinical trial target	P03956
M15	kaempferol	Mitogen-activated protein kinase 8	TTDC00102	Clinical trial target	P45983
M15	kaempferol	mRNA of PKA Catalytic Subunit C-alpha	TTDR01375	Research target	P17612
M15	kaempferol	Muscarinic acetylcholine receptor M1	TTDS00002	Successful target	P11229
M15	kaempferol	Muscarinic acetylcholine receptor M2	TTDS00003	Successful target	P08172
M15	kaempferol	Nitric oxide synthase, inducible	TTDS00337	Successful target	P35228
M15	kaempferol	Nitric-oxide synthase, endothelial	TTDC00097	Clinical trial target	P29474
M15	kaempferol	Nuclear receptor coactivator 2	#N/A	#N/A	Q15596
M15	kaempferol	Nuclear receptor subfamily 1 group I member 2	#N/A	#N/A	O75469
M15	kaempferol	Nuclear receptor subfamily 1 group I member 3	#N/A	#N/A	Q14994
M15	kaempferol	Peroxidase C1A	#N/A	#N/A	P11678
M15	kaempferol	Peroxisome proliferator activated receptor gamma	TTDS00338	Successful target	P37231
M15	kaempferol	Peroxisome proliferator-activated receptor gamma	#N/A	#N/A	P37231
M15	kaempferol	Phosphatidylinositol-4,5-bisphosphate 3-kinase catalytic subunit, gamma isoform	#N/A	#N/A	P48736
M15	kaempferol	Progesterone receptor	TTDS00245	Successful target	P06401
M15	kaempferol	Prostaglandin G/H synthase 1	TTDS00040	Successful target	P23219
M15	kaempferol	Prostaglandin G/H synthase 2	TTDS00041	Successful target	P35354
M15	kaempferol	RAC-alpha serine/threonine-protein kinase	#N/A	#N/A	P31749
M15	kaempferol	Serine/threonine-protein phosphatase 2B catalytic subunit alpha isoform	#N/A	#N/A	Q08209
M15	kaempferol	Signal transducer and activator of transcription 1-alpha/beta	#N/A	#N/A	P42224
M15	kaempferol	Sodium-dependent noradrenaline transporter	TTDC00304	Successful target	P23975
M15	kaempferol	Solute carrier family 2, facilitated glucose transporter member 4	#N/A	#N/A	P14672
M15	kaempferol	Thrombin	TTDS00202	Successful target	P00734
M15	kaempferol	Transcription factor AP-1	TTDC00119	Clinical trial target	P05412
M15	kaempferol	Transcription factor p65	#N/A	#N/A	Q04206
M15	kaempferol	Trypsin-1	#N/A	#N/A	P07477
M15	kaempferol	Tumor necrosis factor	TTDS00131	Imprecisely defined successful target type 1 (ambiguous subtype/subunit)	P01375
M15	kaempferol	Type I iodothyronine deiodinase	TTDS00426	Successful target	P49895
M15	kaempferol	Vascular cell adhesion protein 1	TTDR00453	Research target	P19320
M15	kaempferol	Xanthine dehydrogenase/oxidase	TTDS00056	Successful target	P47989
M16	FA	Cell division protein kinase 2	TTDC00088	Successful target	P24941
M16	FA	Glycogen synthase kinase-3 beta	TTDC00162	Clinical trial target	P49841
M16	FA	Thrombin	TTDS00202	Successful target	P00734
M18	isomucronulatol-7,2'-di-O-glucosiole	DNA topoisomerase II	#N/A	#N/A	Q02880
M19	1,7-Dihydroxy-3,9-dimethoxy pterocarpene	Heat shock protein HSP 90	TTDC00018	Clinical trial target	P07900
M19	1,7-Dihydroxy-3,9-dimethoxy pterocarpene	Prostaglandin G/H synthase 2	TTDS00041	Successful target	P35354
M19	1,7-Dihydroxy-3,9-dimethoxy pterocarpene	Retinoic acid receptor RXR-alpha	TTDR01073	Research target	P19793
M19	1,7-Dihydroxy-3,9-dimethoxy pterocarpene	Trypsin-1	#N/A	#N/A	P07477
M20	quercetin	26S proteasome non-ATPase regulatory subunit 3			O43242
M20	quercetin	72 kDa type IV collagenase	TTDC00104	Clinical trial target	P08253
M20	quercetin	78 kDa glucose-regulated protein	TTDI02087	Clinical trial target	P11021
M20	quercetin	Acetylcholinesterase	TTDS00140	Successful target	P22303
M20	quercetin	Acetyl-CoA carboxylase 1	TTDR00275	Research target	Q13085
M20	quercetin	Activator of 90 kDa heat shock protein ATPase homolog 1			O95433
M20	quercetin	Aldose reductase	TTDS00115	Successful target	P15121
M20	quercetin	Amine oxidase [flavin-containing] B	TTDS00341	Successful target	P27338
M20	quercetin	Androgen receptor	TTDS00367	Successful target	P10275
M20	quercetin	Apoptosis regulator BAX			Q07812
M20	quercetin	Apoptosis regulator Bcl-2	TTDC00319	Successful target	P10415
M20	quercetin	Arachidonate 5-lipoxygenase	TTDS00112	Successful target	P09917
M20	quercetin	Aryl hydrocarbon receptor	TTDI02013	Research target	P35869
M20	quercetin	ATP-binding cassette sub-family G member 2			Q9UNQ0
M20	quercetin	Baculoviral IAP repeat-containing protein 5	TTDC00273	Clinical trial target	O15392
M20	quercetin	Bcl-2-like protein 1			Q07817
M20	quercetin	Beta-2 adrenergic receptor	TTDS00037	Successful target	P07550
M20	quercetin	Caspase-3			P42574
M20	quercetin	Caspase-8	TTDR00433	Research target	Q14790
M20	quercetin	Caspase-9	TTDR01006	Clinical trial target	P55211
M20	quercetin	Cathepsin D	TTDR00447	Clinical trial target	P07339
M20	quercetin	Caveolin-1	TTDR00527	Research target	Q03135
M20	quercetin	C-C motif chemokine 2	TTDR00451	Clinical trial target	P13500
M20	quercetin	CD40 ligand			P29965
M20	quercetin	Cell division control protein 2 homolog	TTDC00166	Clinical trial target	P06493
M20	quercetin	Cellular tumor antigen p53	TTDC00118	Clinical trial target	P04637
M20	quercetin	Claudin-4	TTDR01124	Research target	O14493
M20	quercetin	Coagulation factor VII	TTDR00947	Successful target	P08709
M20	quercetin	Coagulation factor Xa	TTDS00203	Successful target	P00742
M20	quercetin	Collagen alpha-1(I) chain			P02452
M20	quercetin	Collagen alpha-1(III) chain			P02461
M20	quercetin	C-reactive protein			P02741
M20	quercetin	C-X-C motif chemokine 10			P02778
M20	quercetin	C-X-C motif chemokine 11			O14625
M20	quercetin	C-X-C motif chemokine 2			P19875
M20	quercetin	Cyclin-dependent kinase inhibitor 1	TTDR00667	Research target	P38936
M20	quercetin	Cyclin-dependent kinase inhibitor 2A, isoforms 1/2/3			P04637
M20	quercetin	Cytochrome P450 1A1			P04798
M20	quercetin	Cytochrome P450 1A2			P05177
M20	quercetin	Cytochrome P450 1B1	TTDR00242	Clinical trial target	Q16678
M20	quercetin	Cytochrome P450 3A4	TTDS00418	Successful target	P08684
M20	quercetin	DDB1- and CUL4-associated factor 5			Q96JK2
M20	quercetin	Dipeptidyl peptidase IV	TTDS00093	Successful target	P27487
M20	quercetin	DNA gyrase subunit B			P11387
M20	quercetin	DNA topoisomerase 1			P11387
M20	quercetin	DNA topoisomerase 2-alpha			P11388
M20	quercetin	DNA topoisomerase II			Q02880
M20	quercetin	Dual oxidase 2			Q9NRD8
M20	quercetin	Epidermal growth factor receptor	TTDS00355	Successful target	P00533
M20	quercetin	E-selectin	TTDC00098	Clinical trial target	P16581
M20	quercetin	Estrogen sulfotransferase			P49888
M20	quercetin	ETS domain-containing protein Elk-1			P19419
M20	quercetin	Eukaryotic translation initiation factor 6			Q545K4
M20	quercetin	G1/S-specific cyclin-D1			P24385
M20	quercetin	G2/mitotic-specific cyclin-B1			P14635
M20	quercetin	Gamma-aminobutyric acid receptor subunit alpha-1	TTDS00403	Successful target	P14867
M20	quercetin	Gap junction alpha-1 protein	TTDR00293	Clinical trial target	P17302
M20	quercetin	Glutathione S-transferase Mu 1			P09488
M20	quercetin	Glutathione S-transferase Mu 2			P28161
M20	quercetin	Glutathione S-transferase P	TTDI02088	Clinical trial target	P09211
M20	quercetin	Heat shock factor protein 1	TTDR01103	Research target	Q00613
M20	quercetin	Heat shock protein beta-1			P04792
M20	quercetin	Heat shock protein HSP 90	TTDC00018	Clinical trial target	P07900
M20	quercetin	Heme oxygenase 1	TTDC00134	Clinical trial target	P09601
M20	quercetin	Hexokinase-2			P52789
M20	quercetin	Homeobox protein Nkx-3.1			Q99801
M20	quercetin	Hyaluronan synthase 2			Q92819
M20	quercetin	Hypoxia-inducible factor 1-alpha			Q16665
M20	quercetin	Inhibitor of nuclear factor kappa-B kinase subunit alpha			O15111
M20	quercetin	Insulin receptor	TTDS00292	Successful target	P06213
M20	quercetin	Insulin-like growth factor II	TTDR00252	Research target	P01344
M20	quercetin	Insulin-like growth factor-binding protein 3			P17936
M20	quercetin	Intercellular adhesion molecule 1			P01583
M20	quercetin	Interferon gamma	TTDC00096	Clinical trial target	P01579
M20	quercetin	Interferon regulatory factor 1	TTDR00427	Research target	P10914
M20	quercetin	Interleukin-1 alpha			P01583
M20	quercetin	Interleukin-1 beta	TTDS00447	Successful target	P01584
M20	quercetin	Interleukin-10	TTDR00138	Clinical trial target	P22301
M20	quercetin	Interleukin-2	TTDR00141	Clinical trial target	P60568
M20	quercetin	Interleukin-6	TTDC00080	Successful target	P05231
M20	quercetin	Interleukin-8	TTDR00205	Clinical trial target	P10145
M20	quercetin	Interstitial collagenase	TTDC00147	Clinical trial target	P03956
M20	quercetin	Maltase-glucoamylase, intestinal	TTDS00291	Successful target	O43451
M20	quercetin	Matrix metalloproteinase-9			P14780
M20	quercetin	Mitogen-activated protein kinase 1	TTDR00372	Clinical trial target	P28482
M20	quercetin	mRNA of PKA Catalytic Subunit C-alpha	TTDR01375	Research target	P17612
M20	quercetin	Myc proto-oncogene protein	TTDC00271	Clinical trial target	P01106
M20	quercetin	Myeloperoxidase	TTDC00199	Clinical trial target	P05164
M20	quercetin	NAD(P)H dehydrogenase [quinone] 1	TTDC00200	Clinical trial target	P15559
M20	quercetin	NADPH--cytochrome P450 reductase			P16435
M20	quercetin	Neutrophil cytosol factor 1	TTDR00938	Research target	P14598
M20	quercetin	NF-kappa-B inhibitor alpha			P25963
M20	quercetin	Nitric oxide synthase, endothelial			P29474
M20	quercetin	Nitric-oxide synthase, endothelial	TTDC00097	Clinical trial target	P29474
M20	quercetin	Nuclear factor erythroid 2-related factor 2	TTDNR00714	Clinical trial target	Q16236
M20	quercetin	Nuclear receptor coactivator 2			Q15596
M20	quercetin	Nuclear receptor subfamily 1 group I member 2			O75469
M20	quercetin	Nuclear receptor subfamily 1 group I member 3			Q14994
M20	quercetin	Ornithine decarboxylase	TTDS00313	Successful target	P11926
M20	quercetin	Osteopontin	TTDR00484	Research target	P10451
M20	quercetin	Peroxidase C1A			P11678
M20	quercetin	Peroxisome proliferator activated receptor gamma	TTDS00338	Successful target	P37231
M20	quercetin	Peroxisome proliferator-activated receptor alpha			Q07869
M20	quercetin	Peroxisome proliferator-activated receptor delta			Q03181
M20	quercetin	Peroxisome proliferator-activated receptor gamma			P37231
M20	quercetin	Phosphatidylinositol-3,4,5-trisphosphate 3-phosphatase and dual-specificity protein phosphatase PTEN			P60484
M20	quercetin	Phosphatidylinositol-4,5-bisphosphate 3-kinase catalytic subunit, gamma isoform			P48736
M20	quercetin	Plasminogen activator inhibitor 1			P05121
M20	quercetin	Poly [ADP-ribose] polymerase 1			P09874
M20	quercetin	Potassium voltage-gated channel subfamily H member 2	TTDS00147	Successful target	Q12809
M20	quercetin	Probable E3 ubiquitin-protein ligase HERC5			Q9UII4
M20	quercetin	Procollagen C-endopeptidase enhancer 1			Q15113
M20	quercetin	Pro-epidermal growth factor			P01133
M20	quercetin	Prostaglandin E2 receptor EP3 subtype	TTDC00037	Successful target	P43115
M20	quercetin	Prostaglandin G/H synthase 1	TTDS00040	Successful target	P23219
M20	quercetin	Prostaglandin G/H synthase 2	TTDS00041	Successful target	P35354
M20	quercetin	Prostatic acid phosphatase			P15309
M20	quercetin	Protein CBFA2T1			Q06455
M20	quercetin	Protein kinase C alpha type			P17252
M20	quercetin	Protein kinase C beta type			P05771
M20	quercetin	Proto-oncogene c-Fos			P01100
M20	quercetin	Puromycin-sensitive aminopeptidase	TTDC00249	Clinical trial target	P55786
M20	quercetin	RAC-alpha serine/threonine-protein kinase			P31749
M20	quercetin	RAF proto-oncogene serine/threonine-protein kinase			P04049
M20	quercetin	Ras association domain-containing protein 1			Q9NS23
M20	quercetin	Ras GTPase-activating protein 1			P20936
M20	quercetin	Receptor tyrosine-protein kinase erbB-2			P04626
M20	quercetin	Receptor tyrosine-protein kinase erbB-3			P21860
M20	quercetin	Retinoblastoma-associated protein			P06400
M20	quercetin	Retinoic acid receptor RXR-alpha	TTDR01073	Research target	P19793
M20	quercetin	Runt-related transcription factor 2	TTDI02413	Research target	Q13950
M20	quercetin	Serine/threonine-protein kinase Chk2	TTDC00010	Clinical trial target	O96017
M20	quercetin	Serum paraoxonase/arylesterase 1	TTDR00684	Research target	P27169
M20	quercetin	Signal transducer and activator of transcription 1-alpha/beta			P42224
M20	quercetin	Sodium channel protein type 5 subunit alpha	TTDS00402	Successful target	Q14524
M20	quercetin	Solute carrier family 2, facilitated glucose transporter member 4			P14672
M20	quercetin	Stromelysin-1	TTDC00105	Clinical trial target	P08254
M20	quercetin	Superoxide dismutase [Cu-Zn]	TTDR00265	Clinical trial target	P00441
M20	quercetin	Thrombin	TTDS00202	Successful target	P00734
M20	quercetin	Thrombomodulin	TTDR00395	Clinical trial target	P07204
M20	quercetin	Tissue factor	TTDR00396	Clinical trial target	P13726
M20	quercetin	Tissue-type plasminogen activator	TTDR01233	Research target	P00750
M20	quercetin	Transcription factor AP-1	TTDC00119	Clinical trial target	P05412
M20	quercetin	Transcription factor E2F1			Q01094
M20	quercetin	Transcription factor E2F2	TTDR00885	Research target	Q14209
M20	quercetin	Transcription factor p65			Q04206
M20	quercetin	Transforming growth factor beta-1			P01137
M20	quercetin	Trypsin-1			P07477
M20	quercetin	Tumor necrosis factor	TTDS00131	Imprecisely defined successful target type 1 (ambiguous subtype/subunit)	P01375
M20	quercetin	Type I iodothyronine deiodinase	TTDS00426	Successful target	P49895
M20	quercetin	Urokinase-type plasminogen activator	TTDC00312	Successful target	P00749
M20	quercetin	Vascular cell adhesion protein 1	TTDR00453	Research target	P19320
M20	quercetin	Vascular endothelial growth factor A			P15692
M20	quercetin	Xanthine dehydrogenase/oxidase	TTDS00056	Successful target	P47989
M21	(2R)-5,7-dihydroxy-2-(4-hydroxyphenyl)chroman-4-one	Beta-lactamase	TTDS00228	Imprecisely defined successful target type 2 (ambiguous target species)	P00807
M21	(2R)-5,7-dihydroxy-2-(4-hydroxyphenyl)chroman-4-one	Estrogen receptor	TTDS00242	Imprecisely defined successful target type 1 (ambiguous subtype/subunit)	P03372
M21	(2R)-5,7-dihydroxy-2-(4-hydroxyphenyl)chroman-4-one	Glucocorticoid receptor	TTDS00283	Successful target	P04150
M21	(2R)-5,7-dihydroxy-2-(4-hydroxyphenyl)chroman-4-one	Heat shock protein HSP 90	TTDC00018	Clinical trial target	P07900
M21	(2R)-5,7-dihydroxy-2-(4-hydroxyphenyl)chroman-4-one	Mineralocorticoid receptor	TTDS00206	Successful target	P08235
M21	(2R)-5,7-dihydroxy-2-(4-hydroxyphenyl)chroman-4-one	mRNA of PKA Catalytic Subunit C-alpha	TTDR01375	Research target	P17612
M21	(2R)-5,7-dihydroxy-2-(4-hydroxyphenyl)chroman-4-one	Progesterone receptor	TTDS00245	Successful target	P06401
M21	(2R)-5,7-dihydroxy-2-(4-hydroxyphenyl)chroman-4-one	Prostaglandin G/H synthase 1	TTDS00040	Successful target	P23219
M21	(2R)-5,7-dihydroxy-2-(4-hydroxyphenyl)chroman-4-one	Prostaglandin G/H synthase 2	TTDS00041	Successful target	P35354
M22	(S)-Stylopine	5-hydroxytryptamine 2A receptor	TTDS00103	Successful target	P28223
M22	(S)-Stylopine	5-hydroxytryptamine receptor 3A	TTDS00399	Successful target	P46098
M22	(S)-Stylopine	Alpha-1B adrenergic receptor	TTDS00029	Successful target	P35368
M22	(S)-Stylopine	Alpha-1D adrenergic receptor	TTDS00030	Successful target	P25100
M22	(S)-Stylopine	Beta-2 adrenergic receptor	TTDS00037	Successful target	P07550
M22	(S)-Stylopine	Calmodulin	TTDS00432	Successful target	P62158
M22	(S)-Stylopine	Delta-type opioid receptor	TTDS00128	Successful target	P41143
M22	(S)-Stylopine	Muscarinic acetylcholine receptor M1	TTDS00002	Successful target	P11229
M22	(S)-Stylopine	Muscarinic acetylcholine receptor M3	TTDS00004	Successful target	P20309
M22	(S)-Stylopine	Muscarinic acetylcholine receptor M4	TTDS00005	Successful target	P08173
M22	(S)-Stylopine	Muscarinic acetylcholine receptor M5	TTDS00006	Successful target	P08912
M22	(S)-Stylopine	Mu-type opioid receptor	TTDS00126	Successful target	P35372
M22	(S)-Stylopine	Prostaglandin G/H synthase 1	TTDS00040	Successful target	P23219
M22	(S)-Stylopine	Prostaglandin G/H synthase 2	TTDS00041	Successful target	P35354
M22	(S)-Stylopine	Sodium channel protein type 5 subunit alpha	TTDS00402	Successful target	Q14524
M22	(S)-Stylopine	Sodium-dependent serotonin transporter	TTDC00255	Successful target	P31645
M24	Icaride A	Androgen receptor	TTDS00367	Successful target	P10275
M24	Icaride A	Calcium-activated potassium channel subunit alpha 1	#N/A	#N/A	Q12791
M24	Icaride A	Calmodulin	TTDS00432	Successful target	P62158
M24	Icaride A	Coagulation factor VII	TTDR00947	Successful target	P08709
M24	Icaride A	Coagulation factor Xa	TTDS00203	Successful target	P00742
M24	Icaride A	Estrogen receptor	TTDS00242	Imprecisely defined successful target type 1 (ambiguous subtype/subunit)	P03372
M24	Icaride A	Estrogen receptor beta	TTDS00250	Successful target	Q92731
M24	Icaride A	Heat shock protein HSP 90	TTDC00018	Clinical trial target	P07900
M24	Icaride A	Nitric oxide synthase, inducible	TTDS00337	Successful target	P35228
M24	Icaride A	Nuclear receptor coactivator 2	#N/A	#N/A	Q15596
M24	Icaride A	Peroxisome proliferator activated receptor delta	TTDC00069	Clinical trial target	Q03181
M24	Icaride A	Potassium voltage-gated channel subfamily H member 2	TTDS00147	Successful target	Q12809
M24	Icaride A	Prostaglandin G/H synthase 2	TTDS00041	Successful target	P35354
M24	Icaride A	Proto-oncogene serine/threonine-protein kinase Pim-1	#N/A	#N/A	P11309
M24	Icaride A	Thrombin	TTDS00202	Successful target	P00734
M24	Icaride A	Trypsin-1	#N/A	#N/A	P07477
M25	Isostrychnine N-oxide (I)	Delta-type opioid receptor	TTDS00128	Successful target	P41143
M25	Isostrychnine N-oxide (I)	Muscarinic acetylcholine receptor M1	TTDS00002	Successful target	P11229
M25	Isostrychnine N-oxide (I)	Muscarinic acetylcholine receptor M2	TTDS00003	Successful target	P08172
M25	Isostrychnine N-oxide (I)	Muscarinic acetylcholine receptor M3	TTDS00004	Successful target	P20309
M25	Isostrychnine N-oxide (I)	Muscarinic acetylcholine receptor M5	TTDS00006	Successful target	P08912
M25	Isostrychnine N-oxide (I)	Mu-type opioid receptor	TTDS00126	Successful target	P35372
M25	Isostrychnine N-oxide (I)	Sodium channel protein type 5 subunit alpha	TTDS00402	Successful target	Q14524
M26	Isostrychnine N-oxide (II)	Delta-type opioid receptor	TTDS00128	Successful target	P41143
M26	Isostrychnine N-oxide (II)	Muscarinic acetylcholine receptor M1	TTDS00002	Successful target	P11229
M26	Isostrychnine N-oxide (II)	Muscarinic acetylcholine receptor M3	TTDS00004	Successful target	P20309
M26	Isostrychnine N-oxide (II)	Mu-type opioid receptor	TTDS00126	Successful target	P35372
M27	Lokundjoside_qt	Mineralocorticoid receptor	TTDS00206	Successful target	P08235
M28	vomicine	5-hydroxytryptamine 2A receptor	TTDS00103	Successful target	P28223
M28	vomicine	5-hydroxytryptamine 7 receptor	TTDR00157	Clinical trial target	P34969
M28	vomicine	Delta-type opioid receptor	TTDS00128	Successful target	P41143
M28	vomicine	Muscarinic acetylcholine receptor M1	TTDS00002	Successful target	P11229
M28	vomicine	Muscarinic acetylcholine receptor M5	TTDS00006	Successful target	P08912
M28	vomicine	Mu-type opioid receptor	TTDS00126	Successful target	P35372
M29	brucine-N-oxide	Mu-type opioid receptor	TTDS00126	Successful target	P35372
M30	Isobrucine	5-hydroxytryptamine 2A receptor	TTDS00103	Successful target	P28223
M30	Isobrucine	Alpha-1A adrenergic receptor	TTDC00292	Successful target	P35348
M30	Isobrucine	Alpha-1B adrenergic receptor	TTDS00029	Successful target	P35368
M30	Isobrucine	Delta-type opioid receptor	TTDS00128	Successful target	P41143
M30	Isobrucine	Muscarinic acetylcholine receptor M1	TTDS00002	Successful target	P11229
M30	Isobrucine	Muscarinic acetylcholine receptor M2	TTDS00003	Successful target	P08172
M30	Isobrucine	Muscarinic acetylcholine receptor M3	TTDS00004	Successful target	P20309
M30	Isobrucine	Muscarinic acetylcholine receptor M4	TTDS00005	Successful target	P08173
M30	Isobrucine	Muscarinic acetylcholine receptor M5	TTDS00006	Successful target	P08912
M30	Isobrucine	Mu-type opioid receptor	TTDS00126	Successful target	P35372
M30	Isobrucine	Neuronal acetylcholine receptor subunit alpha-2	TTDS00400	Successful target	Q15822
M30	Isobrucine	Sodium channel protein type 5 subunit alpha	TTDS00402	Successful target	Q14524
M31	Brucine N-oxide	Mu-type opioid receptor	TTDS00126	Successful target	P35372
M32	Stigmasterol	5-hydroxytryptamine 2A receptor	TTDS00103	Successful target	P28223
M32	Stigmasterol	Alcohol dehydrogenase 1C	#N/A	#N/A	P00326
M32	Stigmasterol	Aldose reductase	TTDS00115	Successful target	P15121
M32	Stigmasterol	Alpha-1A adrenergic receptor	TTDC00292	Successful target	P35348
M32	Stigmasterol	Alpha-1B adrenergic receptor	TTDS00029	Successful target	P35368
M32	Stigmasterol	Alpha-2A adrenergic receptor	TTDS00032	Successful target	P08913
M32	Stigmasterol	Amine oxidase [flavin-containing] A	TTDS00289	Successful target	P21397
M32	Stigmasterol	Amine oxidase [flavin-containing] B	TTDS00341	Successful target	P27338
M32	Stigmasterol	Beta-1 adrenergic receptor	TTDS00036	Successful target	P08588
M32	Stigmasterol	Beta-2 adrenergic receptor	TTDS00037	Successful target	P07550
M32	Stigmasterol	Chymotrypsinogen B	#N/A	#N/A	P17538
M32	Stigmasterol	Gamma-aminobutyric acid receptor subunit alpha-1	TTDS00403	Successful target	P14867
M32	Stigmasterol	Gamma-aminobutyric-acid receptor alpha-3 subunit	TTDR01178	Clinical trial target	P34903
M32	Stigmasterol	Ig gamma-1 chain C region	#N/A	#N/A	P01857
M32	Stigmasterol	Leukotriene A-4 hydrolase	TTDC00130	Successful target	P09960
M32	Stigmasterol	Mineralocorticoid receptor	TTDS00206	Successful target	P08235
M32	Stigmasterol	mRNA of PKA Catalytic Subunit C-alpha	TTDR01375	Research target	P17612
M32	Stigmasterol	Muscarinic acetylcholine receptor M1	TTDS00002	Successful target	P11229
M32	Stigmasterol	Muscarinic acetylcholine receptor M2	TTDS00003	Successful target	P08172
M32	Stigmasterol	Muscarinic acetylcholine receptor M3	TTDS00004	Successful target	P20309
M32	Stigmasterol	Neuronal acetylcholine receptor protein, alpha-7 chain	TTDS00520	Successful target	P36544
M32	Stigmasterol	Nuclear receptor coactivator 1	#N/A	#N/A	Q15788
M32	Stigmasterol	Nuclear receptor coactivator 2	#N/A	#N/A	Q15596
M32	Stigmasterol	Progesterone receptor	TTDS00245	Successful target	P06401
M32	Stigmasterol	Prostaglandin G/H synthase 1	TTDS00040	Successful target	P23219
M32	Stigmasterol	Prostaglandin G/H synthase 2	TTDS00041	Successful target	P35354
M32	Stigmasterol	Retinoic acid receptor RXR-alpha	TTDR01073	Research target	P19793
M32	Stigmasterol	Sodium channel protein type 5 subunit alpha	TTDS00402	Successful target	Q14524
M32	Stigmasterol	Sodium-dependent dopamine transporter	TTDS00017	Successful target	Q01959
M32	Stigmasterol	Sodium-dependent noradrenaline transporter	TTDC00304	Successful target	P23975
M32	Stigmasterol	Urokinase-type plasminogen activator	TTDC00312	Successful target	P00749
M33	(+)-catechin	Beta-lactamase	TTDS00228	Imprecisely defined successful target type 2 (ambiguous target species)	P00807
M33	(+)-catechin	Calmodulin	TTDS00432	Successful target	P62158
M33	(+)-catechin	Catalase	TTDI02035	Clinical trial target	P04040
M33	(+)-catechin	Estrogen receptor	TTDS00242	Imprecisely defined successful target type 1 (ambiguous subtype/subunit)	P03372
M33	(+)-catechin	Heat shock protein HSP 90	TTDC00018	Clinical trial target	P07900
M33	(+)-catechin	Hyaluronan synthase 2	#N/A	#N/A	Q92819
M33	(+)-catechin	mRNA of PKA Catalytic Subunit C-alpha	TTDR01375	Research target	P17612
M33	(+)-catechin	Nuclear receptor coactivator 2	#N/A	#N/A	Q15596
M33	(+)-catechin	Prostaglandin G/H synthase 1	TTDS00040	Successful target	P23219
M33	(+)-catechin	Prostaglandin G/H synthase 2	TTDS00041	Successful target	P35354
M33	(+)-catechin	Retinoic acid receptor RXR-alpha	TTDR01073	Research target	P19793
M34	beta-sitosterol	5-hydroxytryptamine 2A receptor	TTDS00103	Successful target	P28223
M34	beta-sitosterol	Alpha-1A adrenergic receptor	TTDC00292	Successful target	P35348
M34	beta-sitosterol	Alpha-1B adrenergic receptor	TTDS00029	Successful target	P35368
M34	beta-sitosterol	Apoptosis regulator BAX	#N/A	#N/A	Q07812
M34	beta-sitosterol	Apoptosis regulator Bcl-2	TTDC00319	Successful target	P10415
M34	beta-sitosterol	Beta-2 adrenergic receptor	TTDS00037	Successful target	P07550
M34	beta-sitosterol	Caspase-3	#N/A	#N/A	P42574
M34	beta-sitosterol	Caspase-3	#N/A	#N/A	P42574
M34	beta-sitosterol	Caspase-8	TTDR00433	Research target	Q14790
M34	beta-sitosterol	Caspase-8	TTDR00433	Research target	Q14790
M34	beta-sitosterol	Caspase-9	TTDR01006	Clinical trial target	P55211
M34	beta-sitosterol	Caspase-9	TTDR01006	Clinical trial target	P55211
M34	beta-sitosterol	CGMP-inhibited 3',5'-cyclic phosphodiesterase A	TTDS00390	Successful target	Q14432
M34	beta-sitosterol	Cytochrome P450-cam	#N/A	#N/A	P00183
M34	beta-sitosterol	Dopamine D1 receptor	TTDS00011	Successful target	P21728
M34	beta-sitosterol	Gamma-aminobutyric acid receptor subunit alpha-1	TTDS00403	Successful target	P14867
M34	beta-sitosterol	Gamma-aminobutyric-acid receptor alpha-2 subunit	TTDR01177	Clinical trial target	P47869
M34	beta-sitosterol	Gamma-aminobutyric-acid receptor alpha-3 subunit	TTDR01178	Clinical trial target	P34903
M34	beta-sitosterol	Gamma-aminobutyric-acid receptor alpha-5 subunit	TTDR01042	Clinical trial target	P31644
M34	beta-sitosterol	Heat shock protein HSP 90	TTDC00018	Clinical trial target	P07900
M34	beta-sitosterol	Microtubule-associated protein 2	#N/A	#N/A	P11137
M34	beta-sitosterol	mRNA of PKA Catalytic Subunit C-alpha	TTDR01375	Research target	P17612
M34	beta-sitosterol	Muscarinic acetylcholine receptor M1	TTDS00002	Successful target	P11229
M34	beta-sitosterol	Muscarinic acetylcholine receptor M2	TTDS00003	Successful target	P08172
M34	beta-sitosterol	Muscarinic acetylcholine receptor M3	TTDS00004	Successful target	P20309
M34	beta-sitosterol	Muscarinic acetylcholine receptor M4	TTDS00005	Successful target	P08173
M34	beta-sitosterol	Mu-type opioid receptor	TTDS00126	Successful target	P35372
M34	beta-sitosterol	Neuronal acetylcholine receptor protein, alpha-7 chain	TTDS00520	Successful target	P36544
M34	beta-sitosterol	Neuronal acetylcholine receptor subunit alpha-2	TTDS00400	Successful target	Q15822
M34	beta-sitosterol	Nuclear receptor coactivator 2	#N/A	#N/A	Q15596
M34	beta-sitosterol	Nuclear receptor coactivator 2	#N/A	#N/A	P07900
M34	beta-sitosterol	Phosphatidylinositol-4,5-bisphosphate 3-kinase catalytic subunit, gamma isoform	#N/A	#N/A	P48736
M34	beta-sitosterol	Potassium voltage-gated channel subfamily H member 2	TTDS00147	Successful target	Q12809
M34	beta-sitosterol	Progesterone receptor	TTDS00245	Successful target	P06401
M34	beta-sitosterol	Prostaglandin G/H synthase 1	TTDS00040	Successful target	P23219
M34	beta-sitosterol	Prostaglandin G/H synthase 2	TTDS00041	Successful target	P35354
M34	beta-sitosterol	Protein kinase C alpha type	#N/A	#N/A	P17252
M34	beta-sitosterol	Protein kinase C alpha type	#N/A	#N/A	P17252
M34	beta-sitosterol	Serum paraoxonase/arylesterase 1	TTDR00684	Research target	P27169
M34	beta-sitosterol	Sodium channel protein type 5 subunit alpha	TTDS00402	Successful target	Q14524
M34	beta-sitosterol	Sodium-dependent serotonin transporter	TTDC00255	Successful target	P31645
M34	beta-sitosterol	Transcription factor AP-1	TTDC00119	Clinical trial target	P05412
M34	beta-sitosterol	Transforming growth factor beta-1	#N/A	#N/A	P01137
M34	beta-sitosterol	Transforming growth factor beta-1	#N/A	#N/A	P01137
M36	(2R,3R,3aS)-3a-allyl-2-(1,3-benzodioxol-5-yl)-5-methoxy-3-methyl-2,3-dihydrobenzofuran-6-one	Acetylcholinesterase	TTDS00140	Successful target	P22303
M36	(2R,3R,3aS)-3a-allyl-2-(1,3-benzodioxol-5-yl)-5-methoxy-3-methyl-2,3-dihydrobenzofuran-6-one	Alpha-1B adrenergic receptor	TTDS00029	Successful target	P35368
M36	(2R,3R,3aS)-3a-allyl-2-(1,3-benzodioxol-5-yl)-5-methoxy-3-methyl-2,3-dihydrobenzofuran-6-one	Calmodulin	TTDS00432	Successful target	P62158
M36	(2R,3R,3aS)-3a-allyl-2-(1,3-benzodioxol-5-yl)-5-methoxy-3-methyl-2,3-dihydrobenzofuran-6-one	Carbonic anhydrase II	TTDS00306	Successful target	P00918
M36	(2R,3R,3aS)-3a-allyl-2-(1,3-benzodioxol-5-yl)-5-methoxy-3-methyl-2,3-dihydrobenzofuran-6-one	CGMP-inhibited 3',5'-cyclic phosphodiesterase A	TTDS00390	Successful target	Q14432
M36	(2R,3R,3aS)-3a-allyl-2-(1,3-benzodioxol-5-yl)-5-methoxy-3-methyl-2,3-dihydrobenzofuran-6-one	Coagulation factor Xa	TTDS00203	Successful target	P00742
M36	(2R,3R,3aS)-3a-allyl-2-(1,3-benzodioxol-5-yl)-5-methoxy-3-methyl-2,3-dihydrobenzofuran-6-one	Dipeptidyl peptidase IV	TTDS00093	Successful target	P27487
M36	(2R,3R,3aS)-3a-allyl-2-(1,3-benzodioxol-5-yl)-5-methoxy-3-methyl-2,3-dihydrobenzofuran-6-one	Heat shock protein HSP 90	TTDC00018	Clinical trial target	P07900
M36	(2R,3R,3aS)-3a-allyl-2-(1,3-benzodioxol-5-yl)-5-methoxy-3-methyl-2,3-dihydrobenzofuran-6-one	Muscarinic acetylcholine receptor M1	TTDS00002	Successful target	P11229
M36	(2R,3R,3aS)-3a-allyl-2-(1,3-benzodioxol-5-yl)-5-methoxy-3-methyl-2,3-dihydrobenzofuran-6-one	Muscarinic acetylcholine receptor M3	TTDS00004	Successful target	P20309
M36	(2R,3R,3aS)-3a-allyl-2-(1,3-benzodioxol-5-yl)-5-methoxy-3-methyl-2,3-dihydrobenzofuran-6-one	Nuclear receptor coactivator 1	#N/A	#N/A	Q15788
M36	(2R,3R,3aS)-3a-allyl-2-(1,3-benzodioxol-5-yl)-5-methoxy-3-methyl-2,3-dihydrobenzofuran-6-one	Potassium voltage-gated channel subfamily H member 2	TTDS00147	Successful target	Q12809
M36	(2R,3R,3aS)-3a-allyl-2-(1,3-benzodioxol-5-yl)-5-methoxy-3-methyl-2,3-dihydrobenzofuran-6-one	Prostaglandin G/H synthase 1	TTDS00040	Successful target	P23219
M36	(2R,3R,3aS)-3a-allyl-2-(1,3-benzodioxol-5-yl)-5-methoxy-3-methyl-2,3-dihydrobenzofuran-6-one	Prostaglandin G/H synthase 2	TTDS00041	Successful target	P35354
M36	(2R,3R,3aS)-3a-allyl-2-(1,3-benzodioxol-5-yl)-5-methoxy-3-methyl-2,3-dihydrobenzofuran-6-one	Retinoic acid receptor RXR-alpha	TTDR01073	Research target	P19793
M36	(2R,3R,3aS)-3a-allyl-2-(1,3-benzodioxol-5-yl)-5-methoxy-3-methyl-2,3-dihydrobenzofuran-6-one	Sodium channel protein type 5 subunit alpha	TTDS00402	Successful target	Q14524
M36	(2R,3R,3aS)-3a-allyl-2-(1,3-benzodioxol-5-yl)-5-methoxy-3-methyl-2,3-dihydrobenzofuran-6-one	Thrombin	TTDS00202	Successful target	P00734
M36	(2R,3R,3aS)-3a-allyl-2-(1,3-benzodioxol-5-yl)-5-methoxy-3-methyl-2,3-dihydrobenzofuran-6-one	Trypsin-1	#N/A	#N/A	P07477
M38	futokadsurin C	Alpha-1B adrenergic receptor	TTDS00029	Successful target	P35368
M38	futokadsurin C	Alpha-1D adrenergic receptor	TTDS00030	Successful target	P25100
M38	futokadsurin C	Beta-1 adrenergic receptor	TTDS00036	Successful target	P08588
M38	futokadsurin C	Beta-2 adrenergic receptor	TTDS00037	Successful target	P07550
M38	futokadsurin C	Beta-secretase	#N/A	#N/A	P56817
M38	futokadsurin C	Calmodulin	TTDS00432	Successful target	P62158
M38	futokadsurin C	Coagulation factor Xa	TTDS00203	Successful target	P00742
M38	futokadsurin C	Heat shock protein HSP 90	TTDC00018	Clinical trial target	P07900
M38	futokadsurin C	Ig gamma-1 chain C region	#N/A	#N/A	P01857
M38	futokadsurin C	Muscarinic acetylcholine receptor M1	TTDS00002	Successful target	P11229
M38	futokadsurin C	Muscarinic acetylcholine receptor M3	TTDS00004	Successful target	P20309
M38	futokadsurin C	Muscarinic acetylcholine receptor M4	TTDS00005	Successful target	P08173
M38	futokadsurin C	Muscarinic acetylcholine receptor M5	TTDS00006	Successful target	P08912
M38	futokadsurin C	Nuclear receptor coactivator 1	#N/A	#N/A	Q15788
M38	futokadsurin C	Nuclear receptor coactivator 2	#N/A	#N/A	Q15596
M38	futokadsurin C	Potassium voltage-gated channel subfamily H member 2	TTDS00147	Successful target	Q12809
M38	futokadsurin C	Prostaglandin G/H synthase 1	TTDS00040	Successful target	P23219
M38	futokadsurin C	Prostaglandin G/H synthase 2	TTDS00041	Successful target	P35354
M38	futokadsurin C	Retinoic acid receptor RXR-alpha	TTDR01073	Research target	P19793
M38	futokadsurin C	Retinoic acid receptor RXR-beta	#N/A	#N/A	P28702
M38	futokadsurin C	Sodium channel protein type 5 subunit alpha	TTDS00402	Successful target	Q14524
M39	Galgravin	Alpha-1B adrenergic receptor	TTDS00029	Successful target	P35368
M39	Galgravin	Alpha-2C adrenergic receptor	TTDR01180	Successful target	P18825
M39	Galgravin	Beta-2 adrenergic receptor	TTDS00037	Successful target	P07550
M39	Galgravin	Calmodulin	TTDS00432	Successful target	P62158
M39	Galgravin	Estrogen receptor	TTDS00242	Imprecisely defined successful target type 1 (ambiguous subtype/subunit)	P03372
M39	Galgravin	Heat shock protein HSP 90	TTDC00018	Clinical trial target	P07900
M39	Galgravin	Muscarinic acetylcholine receptor M1	TTDS00002	Successful target	P11229
M39	Galgravin	Muscarinic acetylcholine receptor M3	TTDS00004	Successful target	P20309
M39	Galgravin	Nuclear receptor coactivator 2	#N/A	#N/A	Q15596
M39	Galgravin	Potassium voltage-gated channel subfamily H member 2	TTDS00147	Successful target	Q12809
M39	Galgravin	Prostaglandin G/H synthase 2	TTDS00041	Successful target	P35354
M39	Galgravin	Retinoic acid receptor RXR-alpha	TTDR01073	Research target	P19793
M39	Galgravin	Retinoic acid receptor RXR-beta	#N/A	#N/A	P28702
M39	Galgravin	Sodium channel protein type 5 subunit alpha	TTDS00402	Successful target	Q14524
M39	Galgravin	Sodium-dependent dopamine transporter	TTDS00017	Successful target	Q01959
M40	(2S,3S,4S,5S)-2,5-bis(3,4-dimethoxyphenyl)-3,4-dimethyltetrahydrofuran	Alpha-1B adrenergic receptor	TTDS00029	Successful target	P35368
M40	(2S,3S,4S,5S)-2,5-bis(3,4-dimethoxyphenyl)-3,4-dimethyltetrahydrofuran	Calmodulin	TTDS00432	Successful target	P62158
M40	(2S,3S,4S,5S)-2,5-bis(3,4-dimethoxyphenyl)-3,4-dimethyltetrahydrofuran	Estrogen receptor	TTDS00242	Imprecisely defined successful target type 1 (ambiguous subtype/subunit)	P03372
M40	(2S,3S,4S,5S)-2,5-bis(3,4-dimethoxyphenyl)-3,4-dimethyltetrahydrofuran	Heat shock protein HSP 90	TTDC00018	Clinical trial target	P07900
M40	(2S,3S,4S,5S)-2,5-bis(3,4-dimethoxyphenyl)-3,4-dimethyltetrahydrofuran	Muscarinic acetylcholine receptor M1	TTDS00002	Successful target	P11229
M40	(2S,3S,4S,5S)-2,5-bis(3,4-dimethoxyphenyl)-3,4-dimethyltetrahydrofuran	Muscarinic acetylcholine receptor M3	TTDS00004	Successful target	P20309
M40	(2S,3S,4S,5S)-2,5-bis(3,4-dimethoxyphenyl)-3,4-dimethyltetrahydrofuran	Nuclear receptor coactivator 2	#N/A	#N/A	Q15596
M40	(2S,3S,4S,5S)-2,5-bis(3,4-dimethoxyphenyl)-3,4-dimethyltetrahydrofuran	Potassium voltage-gated channel subfamily H member 2	TTDS00147	Successful target	Q12809
M40	(2S,3S,4S,5S)-2,5-bis(3,4-dimethoxyphenyl)-3,4-dimethyltetrahydrofuran	Prostaglandin G/H synthase 2	TTDS00041	Successful target	P35354
M40	(2S,3S,4S,5S)-2,5-bis(3,4-dimethoxyphenyl)-3,4-dimethyltetrahydrofuran	Sodium channel protein type 5 subunit alpha	TTDS00402	Successful target	Q14524
M40	(2S,3S,4S,5S)-2,5-bis(3,4-dimethoxyphenyl)-3,4-dimethyltetrahydrofuran	Sodium-dependent dopamine transporter	TTDS00017	Successful target	Q01959
M42	isofutoquinol A	Prostaglandin G/H synthase 2	TTDS00041	Successful target	P35354
M43	(1R,5S,6R,7R,8R)-3-allyl-6-(3,4-dimethoxyphenyl)-8-hydroxy-1-methoxy-7-methyl-4-bicyclo[3.2.1]oct-2-enone	Alpha-1B adrenergic receptor	TTDS00029	Successful target	P35368
M43	(1R,5S,6R,7R,8R)-3-allyl-6-(3,4-dimethoxyphenyl)-8-hydroxy-1-methoxy-7-methyl-4-bicyclo[3.2.1]oct-2-enone	Beta-2 adrenergic receptor	TTDS00037	Successful target	P07550
M43	(1R,5S,6R,7R,8R)-3-allyl-6-(3,4-dimethoxyphenyl)-8-hydroxy-1-methoxy-7-methyl-4-bicyclo[3.2.1]oct-2-enone	Calmodulin	TTDS00432	Successful target	P62158
M43	(1R,5S,6R,7R,8R)-3-allyl-6-(3,4-dimethoxyphenyl)-8-hydroxy-1-methoxy-7-methyl-4-bicyclo[3.2.1]oct-2-enone	CGMP-inhibited 3',5'-cyclic phosphodiesterase A	TTDS00390	Successful target	Q14432
M43	(1R,5S,6R,7R,8R)-3-allyl-6-(3,4-dimethoxyphenyl)-8-hydroxy-1-methoxy-7-methyl-4-bicyclo[3.2.1]oct-2-enone	Coagulation factor Xa	TTDS00203	Successful target	P00742
M43	(1R,5S,6R,7R,8R)-3-allyl-6-(3,4-dimethoxyphenyl)-8-hydroxy-1-methoxy-7-methyl-4-bicyclo[3.2.1]oct-2-enone	Delta-type opioid receptor	TTDS00128	Successful target	P41143
M43	(1R,5S,6R,7R,8R)-3-allyl-6-(3,4-dimethoxyphenyl)-8-hydroxy-1-methoxy-7-methyl-4-bicyclo[3.2.1]oct-2-enone	Gamma-aminobutyric acid receptor subunit alpha-1	TTDS00403	Successful target	P14867
M43	(1R,5S,6R,7R,8R)-3-allyl-6-(3,4-dimethoxyphenyl)-8-hydroxy-1-methoxy-7-methyl-4-bicyclo[3.2.1]oct-2-enone	Heat shock protein HSP 90	TTDC00018	Clinical trial target	P07900
M43	(1R,5S,6R,7R,8R)-3-allyl-6-(3,4-dimethoxyphenyl)-8-hydroxy-1-methoxy-7-methyl-4-bicyclo[3.2.1]oct-2-enone	Muscarinic acetylcholine receptor M1	TTDS00002	Successful target	P11229
M43	(1R,5S,6R,7R,8R)-3-allyl-6-(3,4-dimethoxyphenyl)-8-hydroxy-1-methoxy-7-methyl-4-bicyclo[3.2.1]oct-2-enone	Muscarinic acetylcholine receptor M2	TTDS00003	Successful target	P08172
M43	(1R,5S,6R,7R,8R)-3-allyl-6-(3,4-dimethoxyphenyl)-8-hydroxy-1-methoxy-7-methyl-4-bicyclo[3.2.1]oct-2-enone	Muscarinic acetylcholine receptor M3	TTDS00004	Successful target	P20309
M43	(1R,5S,6R,7R,8R)-3-allyl-6-(3,4-dimethoxyphenyl)-8-hydroxy-1-methoxy-7-methyl-4-bicyclo[3.2.1]oct-2-enone	Muscarinic acetylcholine receptor M4	TTDS00005	Successful target	P08173
M43	(1R,5S,6R,7R,8R)-3-allyl-6-(3,4-dimethoxyphenyl)-8-hydroxy-1-methoxy-7-methyl-4-bicyclo[3.2.1]oct-2-enone	Muscarinic acetylcholine receptor M5	TTDS00006	Successful target	P08912
M43	(1R,5S,6R,7R,8R)-3-allyl-6-(3,4-dimethoxyphenyl)-8-hydroxy-1-methoxy-7-methyl-4-bicyclo[3.2.1]oct-2-enone	Mu-type opioid receptor	TTDS00126	Successful target	P35372
M43	(1R,5S,6R,7R,8R)-3-allyl-6-(3,4-dimethoxyphenyl)-8-hydroxy-1-methoxy-7-methyl-4-bicyclo[3.2.1]oct-2-enone	Nuclear receptor coactivator 1	#N/A	#N/A	Q15788
M43	(1R,5S,6R,7R,8R)-3-allyl-6-(3,4-dimethoxyphenyl)-8-hydroxy-1-methoxy-7-methyl-4-bicyclo[3.2.1]oct-2-enone	Nuclear receptor coactivator 2	#N/A	#N/A	Q15596
M43	(1R,5S,6R,7R,8R)-3-allyl-6-(3,4-dimethoxyphenyl)-8-hydroxy-1-methoxy-7-methyl-4-bicyclo[3.2.1]oct-2-enone	Prostaglandin G/H synthase 1	TTDS00040	Successful target	P23219
M43	(1R,5S,6R,7R,8R)-3-allyl-6-(3,4-dimethoxyphenyl)-8-hydroxy-1-methoxy-7-methyl-4-bicyclo[3.2.1]oct-2-enone	Prostaglandin G/H synthase 2	TTDS00041	Successful target	P35354
M43	(1R,5S,6R,7R,8R)-3-allyl-6-(3,4-dimethoxyphenyl)-8-hydroxy-1-methoxy-7-methyl-4-bicyclo[3.2.1]oct-2-enone	Retinoic acid receptor RXR-alpha	TTDR01073	Research target	P19793
M43	(1R,5S,6R,7R,8R)-3-allyl-6-(3,4-dimethoxyphenyl)-8-hydroxy-1-methoxy-7-methyl-4-bicyclo[3.2.1]oct-2-enone	Sodium channel protein type 5 subunit alpha	TTDS00402	Successful target	Q14524
M44	Bicyclo(3.2.1)oct-3-ene-2,8-dione, 7-(4-hydroxy-3-methoxyphenyl)-5-methoxy-6-methyl-3-(2-propenyl)-, (1R-(6-endo,7-exo))-	Gamma-aminobutyric acid receptor subunit alpha-1	TTDS00403	Successful target	P14867
M44	Bicyclo(3.2.1)oct-3-ene-2,8-dione, 7-(4-hydroxy-3-methoxyphenyl)-5-methoxy-6-methyl-3-(2-propenyl)-, (1R-(6-endo,7-exo))-	Prostaglandin G/H synthase 1	TTDS00040	Successful target	P23219
M44	Bicyclo(3.2.1)oct-3-ene-2,8-dione, 7-(4-hydroxy-3-methoxyphenyl)-5-methoxy-6-methyl-3-(2-propenyl)-, (1R-(6-endo,7-exo))-	Prostaglandin G/H synthase 2	TTDS00041	Successful target	P35354
M44	Bicyclo(3.2.1)oct-3-ene-2,8-dione, 7-(4-hydroxy-3-methoxyphenyl)-5-methoxy-6-methyl-3-(2-propenyl)-, (1R-(6-endo,7-exo))-	Sodium channel protein type 5 subunit alpha	TTDS00402	Successful target	Q14524
M45	acetic acid [(1R,5S,6R,7R,8R)-3-allyl-6-(3,4-dimethoxyphenyl)-1-methoxy-7-methyl-4-oxo-8-bicyclo[3.2.1]oct-2-enyl] ester	Carbonic anhydrase II	TTDS00306	Successful target	P00918
M45	acetic acid [(1R,5S,6R,7R,8R)-3-allyl-6-(3,4-dimethoxyphenyl)-1-methoxy-7-methyl-4-oxo-8-bicyclo[3.2.1]oct-2-enyl] ester	Coagulation factor Xa	TTDS00203	Successful target	P00742
M45	acetic acid [(1R,5S,6R,7R,8R)-3-allyl-6-(3,4-dimethoxyphenyl)-1-methoxy-7-methyl-4-oxo-8-bicyclo[3.2.1]oct-2-enyl] ester	DNA topoisomerase II	#N/A	#N/A	Q02880
M45	acetic acid [(1R,5S,6R,7R,8R)-3-allyl-6-(3,4-dimethoxyphenyl)-1-methoxy-7-methyl-4-oxo-8-bicyclo[3.2.1]oct-2-enyl] ester	Heat shock protein HSP 90	TTDC00018	Clinical trial target	P07900
M45	acetic acid [(1R,5S,6R,7R,8R)-3-allyl-6-(3,4-dimethoxyphenyl)-1-methoxy-7-methyl-4-oxo-8-bicyclo[3.2.1]oct-2-enyl] ester	Nuclear receptor coactivator 2	#N/A	#N/A	Q15596
M45	acetic acid [(1R,5S,6R,7R,8R)-3-allyl-6-(3,4-dimethoxyphenyl)-1-methoxy-7-methyl-4-oxo-8-bicyclo[3.2.1]oct-2-enyl] ester	Prostaglandin G/H synthase 2	TTDS00041	Successful target	P35354
M45	acetic acid [(1R,5S,6R,7R,8R)-3-allyl-6-(3,4-dimethoxyphenyl)-1-methoxy-7-methyl-4-oxo-8-bicyclo[3.2.1]oct-2-enyl] ester	Sodium channel protein type 5 subunit alpha	TTDS00402	Successful target	Q14524
M45	acetic acid [(1R,5S,6R,7R,8R)-3-allyl-6-(3,4-dimethoxyphenyl)-1-methoxy-7-methyl-4-oxo-8-bicyclo[3.2.1]oct-2-enyl] ester	Trypsin-1	#N/A	#N/A	P07477
M46	(2S,3S)-2-(3,4-dimethoxyphenyl)-7-methoxy-3-methyl-2,3-dihydrobenzofuran-5-carbaldehyde	Acetylcholinesterase	TTDS00140	Successful target	P22303
M46	(2S,3S)-2-(3,4-dimethoxyphenyl)-7-methoxy-3-methyl-2,3-dihydrobenzofuran-5-carbaldehyde	Alpha-1B adrenergic receptor	TTDS00029	Successful target	P35368
M46	(2S,3S)-2-(3,4-dimethoxyphenyl)-7-methoxy-3-methyl-2,3-dihydrobenzofuran-5-carbaldehyde	Beta-2 adrenergic receptor	TTDS00037	Successful target	P07550
M46	(2S,3S)-2-(3,4-dimethoxyphenyl)-7-methoxy-3-methyl-2,3-dihydrobenzofuran-5-carbaldehyde	Calmodulin	TTDS00432	Successful target	P62158
M46	(2S,3S)-2-(3,4-dimethoxyphenyl)-7-methoxy-3-methyl-2,3-dihydrobenzofuran-5-carbaldehyde	Dipeptidyl peptidase IV	TTDS00093	Successful target	P27487
M46	(2S,3S)-2-(3,4-dimethoxyphenyl)-7-methoxy-3-methyl-2,3-dihydrobenzofuran-5-carbaldehyde	Estrogen receptor	TTDS00242	Imprecisely defined successful target type 1 (ambiguous subtype/subunit)	P03372
M46	(2S,3S)-2-(3,4-dimethoxyphenyl)-7-methoxy-3-methyl-2,3-dihydrobenzofuran-5-carbaldehyde	Gamma-aminobutyric acid receptor subunit alpha-1	TTDS00403	Successful target	P14867
M46	(2S,3S)-2-(3,4-dimethoxyphenyl)-7-methoxy-3-methyl-2,3-dihydrobenzofuran-5-carbaldehyde	Heat shock protein HSP 90	TTDC00018	Clinical trial target	P07900
M46	(2S,3S)-2-(3,4-dimethoxyphenyl)-7-methoxy-3-methyl-2,3-dihydrobenzofuran-5-carbaldehyde	mRNA of PKA Catalytic Subunit C-alpha	TTDR01375	Research target	P17612
M46	(2S,3S)-2-(3,4-dimethoxyphenyl)-7-methoxy-3-methyl-2,3-dihydrobenzofuran-5-carbaldehyde	Muscarinic acetylcholine receptor M1	TTDS00002	Successful target	P11229
M46	(2S,3S)-2-(3,4-dimethoxyphenyl)-7-methoxy-3-methyl-2,3-dihydrobenzofuran-5-carbaldehyde	Muscarinic acetylcholine receptor M3	TTDS00004	Successful target	P20309
M46	(2S,3S)-2-(3,4-dimethoxyphenyl)-7-methoxy-3-methyl-2,3-dihydrobenzofuran-5-carbaldehyde	Muscarinic acetylcholine receptor M4	TTDS00005	Successful target	P08173
M46	(2S,3S)-2-(3,4-dimethoxyphenyl)-7-methoxy-3-methyl-2,3-dihydrobenzofuran-5-carbaldehyde	Muscarinic acetylcholine receptor M5	TTDS00006	Successful target	P08912
M46	(2S,3S)-2-(3,4-dimethoxyphenyl)-7-methoxy-3-methyl-2,3-dihydrobenzofuran-5-carbaldehyde	Neuronal acetylcholine receptor protein, alpha-7 chain	TTDS00520	Successful target	P36544
M46	(2S,3S)-2-(3,4-dimethoxyphenyl)-7-methoxy-3-methyl-2,3-dihydrobenzofuran-5-carbaldehyde	Potassium voltage-gated channel subfamily H member 2	TTDS00147	Successful target	Q12809
M46	(2S,3S)-2-(3,4-dimethoxyphenyl)-7-methoxy-3-methyl-2,3-dihydrobenzofuran-5-carbaldehyde	Prostaglandin G/H synthase 1	TTDS00040	Successful target	P23219
M46	(2S,3S)-2-(3,4-dimethoxyphenyl)-7-methoxy-3-methyl-2,3-dihydrobenzofuran-5-carbaldehyde	Prostaglandin G/H synthase 2	TTDS00041	Successful target	P35354
M46	(2S,3S)-2-(3,4-dimethoxyphenyl)-7-methoxy-3-methyl-2,3-dihydrobenzofuran-5-carbaldehyde	Retinoic acid receptor RXR-alpha	TTDR01073	Research target	P19793
M46	(2S,3S)-2-(3,4-dimethoxyphenyl)-7-methoxy-3-methyl-2,3-dihydrobenzofuran-5-carbaldehyde	Retinoic acid receptor RXR-beta	#N/A	#N/A	P28702
M46	(2S,3S)-2-(3,4-dimethoxyphenyl)-7-methoxy-3-methyl-2,3-dihydrobenzofuran-5-carbaldehyde	Sodium channel protein type 5 subunit alpha	TTDS00402	Successful target	Q14524
M46	(2S,3S)-2-(3,4-dimethoxyphenyl)-7-methoxy-3-methyl-2,3-dihydrobenzofuran-5-carbaldehyde	Sodium-dependent serotonin transporter	TTDC00255	Successful target	P31645
M46	(2S,3S)-2-(3,4-dimethoxyphenyl)-7-methoxy-3-methyl-2,3-dihydrobenzofuran-5-carbaldehyde	Thrombin	TTDS00202	Successful target	P00734
M46	(2S,3S)-2-(3,4-dimethoxyphenyl)-7-methoxy-3-methyl-2,3-dihydrobenzofuran-5-carbaldehyde	Trypsin-1	#N/A	#N/A	P07477
M47	Kadsurenone	Acetylcholinesterase	TTDS00140	Successful target	P22303
M47	Kadsurenone	Alpha-1B adrenergic receptor	TTDS00029	Successful target	P35368
M47	Kadsurenone	Alpha-1D adrenergic receptor	TTDS00030	Successful target	P25100
M47	Kadsurenone	Beta-2 adrenergic receptor	TTDS00037	Successful target	P07550
M47	Kadsurenone	Beta-secretase	#N/A	#N/A	P56817
M47	Kadsurenone	Calcium-activated potassium channel subunit alpha 1	#N/A	#N/A	Q12791
M47	Kadsurenone	Calmodulin	TTDS00432	Successful target	P62158
M47	Kadsurenone	Carbonic anhydrase II	TTDS00306	Successful target	P00918
M47	Kadsurenone	CGMP-inhibited 3',5'-cyclic phosphodiesterase A	TTDS00390	Successful target	Q14432
M47	Kadsurenone	Coagulation factor Xa	TTDS00203	Successful target	P00742
M47	Kadsurenone	Dipeptidyl peptidase IV	TTDS00093	Successful target	P27487
M47	Kadsurenone	DNA topoisomerase II	#N/A	#N/A	Q02880
M47	Kadsurenone	Heat shock protein HSP 90	TTDC00018	Clinical trial target	P07900
M47	Kadsurenone	Muscarinic acetylcholine receptor M1	TTDS00002	Successful target	P11229
M47	Kadsurenone	Muscarinic acetylcholine receptor M2	TTDS00003	Successful target	P08172
M47	Kadsurenone	Muscarinic acetylcholine receptor M3	TTDS00004	Successful target	P20309
M47	Kadsurenone	Muscarinic acetylcholine receptor M5	TTDS00006	Successful target	P08912
M47	Kadsurenone	Mu-type opioid receptor	TTDS00126	Successful target	P35372
M47	Kadsurenone	Nuclear receptor coactivator 1	#N/A	#N/A	Q15788
M47	Kadsurenone	Nuclear receptor coactivator 2	#N/A	#N/A	Q15596
M47	Kadsurenone	Potassium voltage-gated channel subfamily H member 2	TTDS00147	Successful target	Q12809
M47	Kadsurenone	Prostaglandin G/H synthase 1	TTDS00040	Successful target	P23219
M47	Kadsurenone	Prostaglandin G/H synthase 2	TTDS00041	Successful target	P35354
M47	Kadsurenone	Retinoic acid receptor RXR-alpha	TTDR01073	Research target	P19793
M47	Kadsurenone	Sodium channel protein type 5 subunit alpha	TTDS00402	Successful target	Q14524
M47	Kadsurenone	Thrombin	TTDS00202	Successful target	P00734
M47	Kadsurenone	Trypsin-1	#N/A	#N/A	P07477
M48	Kadsurin A	Calmodulin	TTDS00432	Successful target	P62158
M48	Kadsurin A	Carbonic anhydrase II	TTDS00306	Successful target	P00918
M48	Kadsurin A	Coagulation factor Xa	TTDS00203	Successful target	P00742
M48	Kadsurin A	DNA topoisomerase II	#N/A	#N/A	Q02880
M48	Kadsurin A	Heat shock protein HSP 90	TTDC00018	Clinical trial target	P07900
M48	Kadsurin A	Nuclear receptor coactivator 2	#N/A	#N/A	Q15596
M48	Kadsurin A	Prostaglandin G/H synthase 2	TTDS00041	Successful target	P35354
M48	Kadsurin A	Sodium channel protein type 5 subunit alpha	TTDS00402	Successful target	Q14524
M49	kadsurin B	Acetylcholinesterase	TTDS00140	Successful target	P22303
M49	kadsurin B	Calmodulin	TTDS00432	Successful target	P62158
M49	kadsurin B	Carbonic anhydrase II	TTDS00306	Successful target	P00918
M49	kadsurin B	Coagulation factor Xa	TTDS00203	Successful target	P00742
M49	kadsurin B	Muscarinic acetylcholine receptor M1	TTDS00002	Successful target	P11229
M49	kadsurin B	Muscarinic acetylcholine receptor M3	TTDS00004	Successful target	P20309
M49	kadsurin B	Nuclear receptor coactivator 1	#N/A	#N/A	Q15788
M49	kadsurin B	Prostaglandin G/H synthase 2	TTDS00041	Successful target	P35354
M49	kadsurin B	Sodium channel protein type 5 subunit alpha	TTDS00402	Successful target	Q14524
M49	kadsurin B	Trypsin-1	#N/A	#N/A	P07477
M51	piperkadsin B	Calmodulin	TTDS00432	Successful target	P62158
M51	piperkadsin B	Carbonic anhydrase II	TTDS00306	Successful target	P00918
M51	piperkadsin B	Coagulation factor VII	TTDR00947	Successful target	P08709
M51	piperkadsin B	Coagulation factor Xa	TTDS00203	Successful target	P00742
M51	piperkadsin B	DNA topoisomerase II	#N/A	#N/A	Q02880
M51	piperkadsin B	Heat shock protein HSP 90	TTDC00018	Clinical trial target	P07900
M51	piperkadsin B	Nuclear receptor coactivator 1	#N/A	#N/A	Q15788
M51	piperkadsin B	Nuclear receptor coactivator 2	#N/A	#N/A	Q15596
M51	piperkadsin B	Prostaglandin G/H synthase 2	TTDS00041	Successful target	P35354
M51	piperkadsin B	Trypsin-1	#N/A	#N/A	P07477
M52	piperlactam S	Prostaglandin G/H synthase 1	TTDS00040	Successful target	P23219
M52	piperlactam S	Prostaglandin G/H synthase 2	TTDS00041	Successful target	P35354
M52	piperlactam S	Sodium channel protein type 5 subunit alpha	TTDS00402	Successful target	Q14524
M54	n-coumaroyltyramine	Amine oxidase [flavin-containing] B	TTDS00341	Successful target	P27338
M54	n-coumaroyltyramine	Beta-2 adrenergic receptor	TTDS00037	Successful target	P07550
M54	n-coumaroyltyramine	Epidermal growth factor receptor	TTDS00355	Successful target	P00533
M54	n-coumaroyltyramine	Leukotriene A-4 hydrolase	TTDC00130	Successful target	P09960
M54	n-coumaroyltyramine	mRNA of PKA Catalytic Subunit C-alpha	TTDR01375	Research target	P17612
M54	n-coumaroyltyramine	Prostaglandin G/H synthase 1	TTDS00040	Successful target	P23219
M55	wallichinine	Alpha-1B adrenergic receptor	TTDS00029	Successful target	P35368
M55	wallichinine	Beta-2 adrenergic receptor	TTDS00037	Successful target	P07550
M55	wallichinine	Calcium-activated potassium channel subunit alpha 1	#N/A	#N/A	Q12791
M55	wallichinine	Calmodulin	TTDS00432	Successful target	P62158
M55	wallichinine	CGMP-inhibited 3',5'-cyclic phosphodiesterase A	TTDS00390	Successful target	Q14432
M55	wallichinine	Coagulation factor VII	TTDR00947	Successful target	P08709
M55	wallichinine	Coagulation factor Xa	TTDS00203	Successful target	P00742
M55	wallichinine	Dipeptidyl peptidase IV	TTDS00093	Successful target	P27487
M55	wallichinine	DNA topoisomerase II	#N/A	#N/A	Q02880
M55	wallichinine	Estrogen receptor	TTDS00242	Imprecisely defined successful target type 1 (ambiguous subtype/subunit)	P03372
M55	wallichinine	Heat shock protein HSP 90	TTDC00018	Clinical trial target	P07900
M55	wallichinine	Muscarinic acetylcholine receptor M1	TTDS00002	Successful target	P11229
M55	wallichinine	Muscarinic acetylcholine receptor M3	TTDS00004	Successful target	P20309
M55	wallichinine	Muscarinic acetylcholine receptor M4	TTDS00005	Successful target	P08173
M55	wallichinine	Muscarinic acetylcholine receptor M5	TTDS00006	Successful target	P08912
M55	wallichinine	Nuclear receptor coactivator 1	#N/A	#N/A	Q15788
M55	wallichinine	Nuclear receptor coactivator 2	#N/A	#N/A	Q15596
M55	wallichinine	Potassium voltage-gated channel subfamily H member 2	TTDS00147	Successful target	Q12809
M55	wallichinine	Prostaglandin G/H synthase 1	TTDS00040	Successful target	P23219
M55	wallichinine	Prostaglandin G/H synthase 2	TTDS00041	Successful target	P35354
M55	wallichinine	Sodium channel protein type 5 subunit alpha	TTDS00402	Successful target	Q14524
M55	wallichinine	Thrombin	TTDS00202	Successful target	P00734
M55	wallichinine	Trypsin-1	#N/A	#N/A	P07477
M56	futoquinol	Acetylcholinesterase	TTDS00140	Successful target	P22303
M56	futoquinol	Alpha-1B adrenergic receptor	TTDS00029	Successful target	P35368
M56	futoquinol	Beta-2 adrenergic receptor	TTDS00037	Successful target	P07550
M56	futoquinol	Calcium-activated potassium channel subunit alpha 1	#N/A	#N/A	Q12791
M56	futoquinol	Calmodulin	TTDS00432	Successful target	P62158
M56	futoquinol	CGMP-inhibited 3',5'-cyclic phosphodiesterase A	TTDS00390	Successful target	Q14432
M56	futoquinol	Coagulation factor VII	TTDR00947	Successful target	P08709
M56	futoquinol	Coagulation factor Xa	TTDS00203	Successful target	P00742
M56	futoquinol	DNA topoisomerase II	#N/A	#N/A	Q02880
M56	futoquinol	Estrogen receptor	TTDS00242	Imprecisely defined successful target type 1 (ambiguous subtype/subunit)	P03372
M56	futoquinol	Heat shock protein HSP 90	TTDC00018	Clinical trial target	P07900
M56	futoquinol	mRNA of PKA Catalytic Subunit C-alpha	TTDR01375	Research target	P17612
M56	futoquinol	Nitric-oxide synthase, endothelial	TTDC00097	Clinical trial target	P29474
M56	futoquinol	Nuclear receptor coactivator 1	#N/A	#N/A	Q15788
M56	futoquinol	Nuclear receptor coactivator 2	#N/A	#N/A	Q15596
M56	futoquinol	Potassium voltage-gated channel subfamily H member 2	TTDS00147	Successful target	Q12809
M56	futoquinol	Prostaglandin G/H synthase 1	TTDS00040	Successful target	P23219
M56	futoquinol	Prostaglandin G/H synthase 2	TTDS00041	Successful target	P35354
M56	futoquinol	Retinoic acid receptor RXR-alpha	TTDR01073	Research target	P19793
M56	futoquinol	Sodium channel protein type 5 subunit alpha	TTDS00402	Successful target	Q14524
M56	futoquinol	Thrombin	TTDS00202	Successful target	P00734
M56	futoquinol	Trypsin-1	#N/A	#N/A	P07477
M59	maristeminol	Mineralocorticoid receptor	TTDS00206	Successful target	P08235
M60	EUPATIN	Androgen receptor	TTDS00367	Successful target	P10275
M60	EUPATIN	Calmodulin	TTDS00432	Successful target	P62158
M60	EUPATIN	Coagulation factor VII	TTDR00947	Successful target	P08709
M60	EUPATIN	Coagulation factor Xa	TTDS00203	Successful target	P00742
M60	EUPATIN	Dipeptidyl peptidase IV	TTDS00093	Successful target	P27487
M60	EUPATIN	DNA topoisomerase II	#N/A	#N/A	Q02880
M60	EUPATIN	Estrogen receptor beta	TTDS00250	Successful target	Q92731
M60	EUPATIN	Heat shock protein HSP 90	TTDC00018	Clinical trial target	P07900
M60	EUPATIN	Nitric oxide synthase, inducible	TTDS00337	Successful target	P35228
M60	EUPATIN	Nuclear receptor coactivator 2	#N/A	#N/A	Q15596
M60	EUPATIN	Peroxisome proliferator activated receptor delta	TTDC00069	Clinical trial target	Q03181
M60	EUPATIN	Prostaglandin G/H synthase 2	TTDS00041	Successful target	P35354
M60	EUPATIN	Sodium channel protein type 5 subunit alpha	TTDS00402	Successful target	Q14524
M60	EUPATIN	Thrombin	TTDS00202	Successful target	P00734
M60	EUPATIN	Trypsin-1	#N/A	#N/A	P07477
M60	EUPATIN	Vascular endothelial growth factor receptor 2	TTDS00008	Successful target	P35968
M62	Physciondiglucoside	DNA topoisomerase II	#N/A	#N/A	Q02880
M64	rhein	Aldose reductase	TTDS00115	Successful target	P15121
M64	rhein	Heat shock protein HSP 90	TTDC00018	Clinical trial target	P07900
M64	rhein	Nuclear receptor coactivator 2	#N/A	#N/A	Q15596
M64	rhein	Phosphatidylinositol-4,5-bisphosphate 3-kinase catalytic subunit, gamma isoform	#N/A	#N/A	P48736
M64	rhein	Prostaglandin G/H synthase 1	TTDS00040	Successful target	P23219
M64	rhein	Prostaglandin G/H synthase 2	TTDS00041	Successful target	P35354
M64	rhein	Transcription factor AP-1	TTDC00119	Clinical trial target	P05412
M66	Torachrysone-8-O-beta-D-(6'-oxayl)-glucoside	DNA topoisomerase II	#N/A	#N/A	Q02880
M67	Toralactone	Estrogen receptor	TTDS00242	Imprecisely defined successful target type 1 (ambiguous subtype/subunit)	P03372
M67	Toralactone	Estrogen receptor beta	TTDS00250	Successful target	Q92731
M67	Toralactone	Heat shock protein HSP 90	TTDC00018	Clinical trial target	P07900
M67	Toralactone	mRNA of PKA Catalytic Subunit C-alpha	TTDR01375	Research target	P17612
M67	Toralactone	Nitric oxide synthase, inducible	TTDS00337	Successful target	P35228
M67	Toralactone	Phosphatidylinositol-4,5-bisphosphate 3-kinase catalytic subunit, gamma isoform	#N/A	#N/A	P48736
M67	Toralactone	Prostaglandin G/H synthase 1	TTDS00040	Successful target	P23219
M67	Toralactone	Prostaglandin G/H synthase 2	TTDS00041	Successful target	P35354
M67	Toralactone	Serine/threonine-protein kinase Chk1	TTDC00005	Clinical trial target	O14757
M68	Emodin-1-O-beta-D-glucopyranoside	DNA topoisomerase II	#N/A	#N/A	Q02880
M70	Daucosterol_qt	Nuclear receptor coactivator 2	#N/A	#N/A	P07900
M70	Daucosterol_qt	Progesterone receptor	TTDS00245	Successful target	P06401
M73	aloe-emodin	Aldose reductase	TTDS00115	Successful target	P15121
M73	aloe-emodin	Apoptosis regulator BAX	#N/A	#N/A	Q07812
M73	aloe-emodin	cAMP-dependent protein kinase inhibitor alpha	#N/A	#N/A	P61925
M73	aloe-emodin	Caspase-3	#N/A	#N/A	P42574
M73	aloe-emodin	Cell division control protein 2 homolog	TTDC00166	Clinical trial target	P06493
M73	aloe-emodin	Cellular tumor antigen p53	TTDC00118	Clinical trial target	P04637
M73	aloe-emodin	Cyclin-dependent kinase inhibitor 1	TTDR00667	Research target	P38936
M73	aloe-emodin	Eukaryotic translation initiation factor 6	#N/A	#N/A	Q545K4
M73	aloe-emodin	Fatty acid synthase	TTDS00295	Imprecisely defined successful target type 1 (ambiguous subtype/subunit)	P49327
M73	aloe-emodin	G2/mitotic-specific cyclin-B1	#N/A	#N/A	P14635
M73	aloe-emodin	Heat shock protein HSP 90	TTDC00018	Clinical trial target	P07900
M73	aloe-emodin	Ig gamma-1 chain C region	#N/A	#N/A	P01857
M73	aloe-emodin	Interleukin-1 beta	TTDS00447	Successful target	P01584
M73	aloe-emodin	mRNA of PKA Catalytic Subunit C-alpha	TTDR01375	Research target	P17612
M73	aloe-emodin	Myc proto-oncogene protein	TTDC00271	Clinical trial target	P01106
M73	aloe-emodin	Nuclear receptor coactivator 2	#N/A	#N/A	Q15596
M73	aloe-emodin	Phosphatidylinositol-4,5-bisphosphate 3-kinase catalytic subunit, gamma isoform	#N/A	#N/A	P48736
M73	aloe-emodin	Proliferating cell nuclear antigen	TTDI00605	Clinical trial target	P12004
M73	aloe-emodin	Prostaglandin G/H synthase 1	TTDS00040	Successful target	P23219
M73	aloe-emodin	Prostaglandin G/H synthase 2	TTDS00041	Successful target	P35354
M73	aloe-emodin	Protein kinase C alpha type	#N/A	#N/A	P17252
M73	aloe-emodin	Protein kinase C delta type	#N/A	#N/A	Q05655
M73	aloe-emodin	Protein kinase C epsilon type	#N/A	#N/A	Q02156
M73	aloe-emodin	Tumor necrosis factor	TTDS00131	Imprecisely defined successful target type 1 (ambiguous subtype/subunit)	P01375
M75	(-)-catechin	Beta-lactamase	TTDS00228	Imprecisely defined successful target type 2 (ambiguous target species)	P00807
M75	(-)-catechin	Calmodulin	TTDS00432	Successful target	P62158
M75	(-)-catechin	Estrogen receptor	TTDS00242	Imprecisely defined successful target type 1 (ambiguous subtype/subunit)	P03372
M75	(-)-catechin	Fatty acid synthase	TTDS00295	Imprecisely defined successful target type 1 (ambiguous subtype/subunit)	P49327
M75	(-)-catechin	Heat shock protein HSP 90	TTDC00018	Clinical trial target	P07900
M75	(-)-catechin	Krueppel-like factor 7	#N/A	#N/A	O75840
M75	(-)-catechin	mRNA of PKA Catalytic Subunit C-alpha	TTDR01375	Research target	P17612
M75	(-)-catechin	Nuclear receptor coactivator 2	#N/A	#N/A	Q15596
M75	(-)-catechin	Peroxisome proliferator-activated receptor gamma	#N/A	#N/A	P37231
M75	(-)-catechin	Prostaglandin G/H synthase 1	TTDS00040	Successful target	P23219
M75	(-)-catechin	Prostaglandin G/H synthase 2	TTDS00041	Successful target	P35354
