# Supplementary material for: Network Pharmacology-Based Approach to Investigate the Mechanisms of Mahai Capsules in the Treatment of Cardiovascular Diseases
Source: Evid Based Complement Alternat Med. 2020 May 12;2020:9180982. doi: 10.1155/2020/9180982 (PMC7243029; doi:10.1155/2020/9180982)
Supplement: Supplementary Materials — Table S1: targets of the 75 candidate compounds of Haima. Table S2: targets-diseases. [file 9180982.f1.zip › 9180982.f1/Table S2-Targets-Diseases.xlsx]

## Sheet: Sheet1
Code	Molecule	Target_Name	Disease	Uniprot ID	Disease 号
M32	Stigmasterol	Alpha-2A adrenergic receptor	Hypertension	P08913	A14
M32	Stigmasterol	Leukotriene A-4 hydrolase	Myocardial infarction	P09960	A15
M20	quercetin	C-C motif chemokine 2	Acute coronary syndromes	P13500	A1
M20	quercetin	Myeloperoxidase	Alzheimer's disease	P05164	A2
M20	quercetin	Cathepsin D	Alzheimer's disease	P07339	A2
M20	quercetin	Interleukin-8	Arthritis	P10145	A4
M20	quercetin	Myeloperoxidase	Atherosclerosis	P05164	A5
M20	quercetin	Tissue factor	Atherosclerosis	P13726	A5
M20	quercetin	C-C motif chemokine 2	Atherosclerosis	P13500	A5
M20	quercetin	Caveolin-1	Atherosclerosis	Q03135	A5
M20	quercetin	Caspase-9	Brain injury associated with seizures	P55211	A7
M20	quercetin	Serum paraoxonase/arylesterase 1	Cardiovascular disease	P27169	A9
M20	quercetin	Tissue factor	Coronary syndromes	P13726	A13
M20	quercetin	Stromelysin-1	Myocardial infarction	P08254	A15
M20	quercetin	Mitogen-activated protein kinase 1	Neurodegenerative diseases	P28482	A16
M20	quercetin	Caspase-8	Neurodegenerative diseases	Q14790	A16
M20	quercetin	Tissue-type plasminogen activator	Neurological diseases	P00750	A17
M20	quercetin	Thrombomodulin	Thrombosis	P07204	A18
M20	quercetin	Tissue factor	Thrombotic disease	P13726	A19
M20	quercetin	Caveolin-1	Vascular impairment associated with diabetes	Q03135	A21
M15	kaempferol	Heme oxygenase 1	Atherosclerosis	P09601	A5
M15	kaempferol	Heme oxygenase 1	Cardiovascular disease	P09601	A9
M15	kaempferol	Interstitial collagenase	Myocardial infarction	P03956	A15
M15	kaempferol	Heme oxygenase 1	Vascular diseases	P09601	A20
M15	kaempferol	Arachidonate 5-lipoxygenase	Vasospasm	P09917	A24
M2	Jaranol	Prostaglandin G/H synthase 2	Alzheimer's disease	P35354	A2
M2	Jaranol	Prostaglandin G/H synthase 2	Arthritis	P35354	A4
M2	Jaranol	Sodium channel protein type 5 subunit alpha	Cardiac dysrhythmias	Q14524	A8
M2	Jaranol	Prostaglandin G/H synthase 1	Cardiovascular disease	P23219	A9
M2	Jaranol	Cell division protein kinase 2	Cardiovascular disease	P24941	A9
M2	Jaranol	Estrogen receptor beta	Cardiovascular disease	Q92731	A9
M2	Jaranol	Prostaglandin G/H synthase 2	Myocardial infarction	P35354	A15
M2	Jaranol	Estrogen receptor beta	Neurodegenerative diseases	Q92731	A16
M2	Jaranol	Estrogen receptor beta	Vascular injury response	Q92731	A22
M2	Jaranol	Prostaglandin G/H synthase 2	Vascular lesion regression	P35354	A23
M5	isorhamnetin	Acetylcholinesterase	Alzheimer's disease	P22303	A2
M5	isorhamnetin	Glycogen synthase kinase-3 beta	Alzheimer's disease	P49841	A2
M5	isorhamnetin	Mitogen-activated protein kinase 14	Alzheimer's disease	Q16539	A2
M5	isorhamnetin	Peroxisome proliferator activated receptor delta	Atherosclerosis	Q03181	A5
M5	isorhamnetin	Peroxisome proliferator activated receptor gamma	Atherosclerosis	P37231	A5
M5	isorhamnetin	Neutrophil cytosol factor 1	Atherosclerosis	P14598	A5
M5	isorhamnetin	Glycogen synthase kinase-3 beta	Brain injury	P49841	A6
M5	isorhamnetin	Estrogen receptor	Brain injury	P03372	A6
M5	isorhamnetin	Nitric-oxide synthase, endothelial	Cardiovascular disease	P29474	A9
M5	isorhamnetin	Estrogen receptor	Cardiovascular disease	P03372	A9
M5	isorhamnetin	Neutrophil cytosol factor 1	Cardiovascular disease	P14598	A9
M5	isorhamnetin	Nitric-oxide synthase, endothelial	Coronary artery disease	P29474	A10
M5	isorhamnetin	Thrombin	Coronary atherosclerosis	P00734	A11
M5	isorhamnetin	Estrogen receptor	Coronary atherosclerosis	P03372	A11
M5	isorhamnetin	Neutrophil cytosol factor 1	Hypertension	P14598	A14
M5	isorhamnetin	Nitric-oxide synthase, endothelial	Hypertension	P29474	A14
M5	isorhamnetin	Estrogen receptor	Neurodegenerative diseases	P03372	A16
M5	isorhamnetin	Amine oxidase [flavin-containing] B	Neurological diseases	P27338	A17
M5	isorhamnetin	Mitogen-activated protein kinase 14	Thrombosis	Q16539	A18
M5	isorhamnetin	Thrombin	Thrombosis	P00734	A18
M5	isorhamnetin	Thrombin	Thrombotic disease	P00734	A19
M3	hederagenin	Muscarinic acetylcholine receptor M1	Alzheimer's disease	P11229	A2
M3	hederagenin	Muscarinic acetylcholine receptor M2	Alzheimer's disease	P08172	A2
M3	hederagenin	Gamma-aminobutyric-acid receptor alpha-5 subunit	Alzheimer's disease	P31644	A2
M3	hederagenin	CGMP-inhibited 3',5'-cyclic phosphodiesterase A	Vascular diseases	Q14432	A20
M38	futokadsurin C	Beta-secretase	Alzheimer's disease	P56817	A2
M12	formononetin	NAD-dependent deacetylase sirtuin-1	Neurological diseases	Q96EB6	A17
M12	formononetin	Transcription factor AP-1	Vascular diseases	P05412	A20
M8	7-O-methylisomucronulatol	5-hydroxytryptamine 2A receptor	Arterial embolism; Thrombosis	P28223	A3
M8	7-O-methylisomucronulatol	Potassium voltage-gated channel subfamily H member 2	Cardiac arrhythmias	Q12809	A8
M8	7-O-methylisomucronulatol	Coagulation factor Xa	Cardiovascular disease	P00742	A9
M8	7-O-methylisomucronulatol	Coagulation factor Xa	Thrombosis	P00742	A18
M8	7-O-methylisomucronulatol	Coagulation factor Xa	Thrombotic disease	P00742	A19
M6	3,9-di-O-methylnissolin	Beta-1 adrenergic receptor	Cardiac arrhythmias	P08588	A8
M6	3,9-di-O-methylnissolin	Beta-2 adrenergic receptor	Cardiac arrhythmias	P07550	A8
M6	3,9-di-O-methylnissolin	Beta-1 adrenergic receptor	Cardiovascular disease	P08588	A9
M6	3,9-di-O-methylnissolin	Beta-1 adrenergic receptor	Coronary heart disease	P08588	A12
M6	3,9-di-O-methylnissolin	Alpha-1D adrenergic receptor	Hypertension	P25100	A14
M6	3,9-di-O-methylnissolin	Beta-1 adrenergic receptor	Hypertension	P08588	A14
M6	3,9-di-O-methylnissolin	Beta-2 adrenergic receptor	Hypertension	P07550	A14
M10	(6aR,11aR)-9,10-dimethoxy-6a,11a-dihydro-6H-benzofurano[3,2-c]chromen-3-ol	Neuronal acetylcholine receptor protein, alpha-7 chain	Alzheimer's disease	P36544	A2
M21	(2R)-5,7-dihydroxy-2-(4-hydroxyphenyl)chroman-4-one	Mineralocorticoid receptor	Brain injury	P08235	A6
M33	(+)-catechin	Catalase	Neurodegenerative diseases	P04040	A16
